SOFTWARE

# KOMB: Taxonomy-oblivious Characterization of Metagenome Dynamics via K-core Decomposition

Advait Balaji<sup>1</sup>, Nicolae Sapoval<sup>1</sup>, R. A. Leo Elworth<sup>1</sup>, Santiago Segarra<sup>1,2</sup> and Todd J. Treangen<sup>1\*</sup>

\*Correspondence:

[treangen@rice.edu](mailto:treangen@rice.edu)

<sup>1</sup>Department of Computer

Science, Rice University, 6100

Main St, 77005 Houston, Texas,

USA

Full list of author information is available at the end of the article

## Abstract

**Background:** Taxonomic classification of microbiomes has provided tremendous insight into the underlying genome dynamics of microbial communities but has relied on known microbial genomes contained in curated reference databases.

**Methods:** We propose K-core graph decomposition as a novel approach for tracking metagenome dynamics that is taxonomy-oblivious. K-core performs hierarchical decomposition which partitions the graph into shells containing nodes having degree at least  $K$  called K-shells, yielding  $O(E + V)$  complexity.

**Results:** The results of the paper are two-fold: (1) KOMB can identify homologous regions efficiently in metagenomes, (2) KOMB reveals community profiles that capture intra- and inter-genome dynamics, as supported by our results on simulated, synthetic, and real data.

**Software Availability:** KOMB is available for use on Linux systems at

<https://gitlab.com/treangenlab/komb.git>

**Keywords:** De Bruijn graph; graph-based analysis; K-core decomposition; metagenome; microbiome; unitigs

1

2

## 3 Background

4 Graph-based representations and analyses paved the way for several advances in  
5 computational biology over the last few decades [1–3]. This is particularly evident  
6 in the progress made in the field of genome assembly, both for isolate genome  
7 assembly [4, 5] and metagenome assembly, as well as efficient detection of struc-  
8 tural variants [6–8] using genome graphs [9–11]. Indeed, state-of-the-art graph-  
9 based metagenome assemblers [12–15] have achieved remarkable improvements in  
10 both run-time and accuracy in recent years [16] through the use of efficient data

11 structures and clever heuristics. Recent examples include compact De Bruijn graph  
12 construction and traversal for assembly [17, 18] as well as scaffold graphs for metage-  
13 nomic samples that can generate scaffolds from contiguous overlapping sequences  
14 (contigs), which are then stitched together by using paired-end read information to  
15 obtain the complete genome [19, 20]. There has also been a recent emphasis towards  
16 constructing De Bruijn graphs that encode the underlying metagenomic population  
17 information such as succinct colored De Bruijn graphs [21, 22, 22].

18 Despite recent advances, genome assembly remains challenging due to the presence  
19 of repetitive sequences and sequencing error, both of which confound graph traversal  
20 needed to generate consensus sequences [23]. This occurs in part due to the presence  
21 of repetitive sequences in the genome that tangle the assembly graph resulting in  
22 nodes with high degrees. This assembly graph tangling creates a non-trivial graph  
23 traversal problem [24]. This is further exacerbated when dealing with metagenomes  
24 as the sequences can contain intra-genomic repeats as well as inter-genomic ho-  
25 mology. Distinguishing paralogs from orthologs, and repeats from homologs can be  
26 challenging, especially if the sample is enriched for closely-related species or strains.  
27 Assemblers or scaffolders often deal with resolving this ambiguity in two ways; ei-  
28 ther by assuming that branches in the graph were a result of base calling errors  
29 and hence collapsing the node, or by stopping the traversal to reveal a fragmented  
30 stretch of unique contiguous subsequences of the genome (unitig) [25, 26]. Thus, for  
31 optimal assembly, it becomes imperative to correctly identify sequences that are  
32 part of these tangled nodes.

33 Another area where repetitive regions play a confounding role is in the identifica-  
34 tion of genomic variations in a large metagenomic sample. Inter-genomic homology  
35 can often link unrelated regions of different but closely related genomes. In addition  
36 to the repetitive regions, non-uniform coverage can result in an increase in false po-  
37 sitive repeats as core genome regions of highly abundant species can be labelled as  
38 repeats [27]. Distinguishing and separating out these genomic regions with varying  
39 degrees of similarities and differences becomes a crucial step for any downstream  
40 metagenomic analysis and allows for careful tracking of genomic diversity within  
41 the sample [28–30].

42 A popular solution that has emerged in the literature is to identify tangled nodes  
43 caused by these different phenomena using the concept of node centrality on graphs.

44 More specifically, the general idea is to employ node centrality measures to separate  
45 high-similarity nodes from non-repeat nodes. Since tangled nodes have on average  
46 a larger degree than other nodes and are well-connected within the graph, it is rea-  
47 sonable to employ centrality measures to identify these nodes. In this context, tools  
48 like MetaCarvel [31] and Bambus2 [25] are examples of methods developed by the  
49 community grounded on the idea of centrality-based repeat detection for the spe-  
50 cific case of betweenness centrality [32,33]. Although methods based on betweenness  
51 centrality can achieve high levels of specificity, they tend to miss out on multiple  
52 repetitive regions leading to loss in sensitivity [24]. Another fundamental draw-  
53 back of betweenness centrality is its high computational complexity  $O(VE)$  [34,35],  
54 where  $V$  denotes the number of nodes and  $E$  the number of edges in the graph,  
55 making impractical its implementation on large metagenomic datasets. To allevi-  
56 ate these concerns, a recent method employs an approximate betweenness central-  
57 ity measure [36,37] to improve the scalability of the approach. The approximate  
58 betweenness centrality relies on subsampling the nodes in the graph to estimate  
59 betweenness centralities in the complete graph. While approximate betweenness  
60 centrality is in practice an order of magnitude faster than the exact counterpart, it  
61 depends on thresholding strategies to achieve good levels of specificity. Moreover,  
62 it was later shown [24] that an ensemble approach using a random forest classifier  
63 and various features from the contig graph (including coverage, contig length, and  
64 centrality) resulted in a slight improvement over using just betweenness centrality  
65 as a measure of repeat detection.

66 In parallel to repeat and homolog detection, there has been an increasing need in  
67 the research community for methods that visually and quantitatively identify mi-  
68 crobial community structures and sequence diversity among the organisms present  
69 in metagenomic samples, particularly in response to perturbations [38]. A tool that  
70 can accurately and efficiently identify and extract information from assembly, con-  
71 tig, or unitig graphs in an intuitive and theoretically grounded framework could  
72 help biologists understand and characterize microbial communities using repeats  
73 and homologous regions of the organisms in their samples [39–42].

74 In this work we present KOMB, a tool that does not rely on reference databases  
75 and can capture highly-connected repetitive regions in an entire genome or a  
76 metagenomic community. We present a novel way of achieving this using the K-

77 core decomposition of a unitig graph that hierarchically separates out repetitive  
78 regions into various shells that can then be used to analyze genomic variation in  
79 the sample. We show that the distribution of nodes could lead to a new method-  
80 ology that describes metagenomic community structure based on sample specific  
81 signatures obtained from KOMB profiles. In Methods, found towards the end of  
82 the manuscript, we describe the pipeline of the tool, explain unitig graph construc-  
83 tion, and elaborate on the concept of K-core decomposition. In the Results section,  
84 we provide a rigorous validation of our novel K-core decomposition tool KOMB as  
85 applied to unitig graphs constructed from simulated data as well as synthetic and  
86 real metagenomes. We demonstrate its effectiveness in identifying repetitive regions  
87 across sample types and sizes and illustrate how KOMB profiles can be used to  
88 visualize community structure. Finally, in the Discussion and Conclusions we cover  
89 the salient points and main conclusions from our study and lay out future directions  
90 of our research.

## 91 **Results**

92 We present a thorough validation of KOMB as applied to various simulated, syn-  
93 thetic, and real datasets. We do this through three major sets of experiments.  
94 First, we demonstrate the efficacy of the application of the K-core decomposition  
95 algorithm in genomics by testing it on simulated genomes constructed as random  
96 sequences to which we have added known repeat families. The simulated backbone  
97 sequences are constructed by appending base pairs uniformly at random until the  
98 desired length is achieved. We then simulate two families of repeats and insert  
99 them into these random backbone sequences using the multinomial distribution to  
100 determine the spacing between the repeats. We simulate two families of repeats,  
101 intra-genomic repeats that are all contained within a particular random genome,  
102 and a second family of inter-genomic repeats contained within multiple genomes.  
103 The results on the simple simulated dataset validate the theoretical results on the K-  
104 shell profiles as discussed in the Methods section and demonstrate KOMB's ability  
105 to unveil repetitive unitigs (Additional File 1, Fig S1).

106 Further, we also analyzed the effects of different read quality control methods  
107 that are traditionally used by biologists. Specifically, we show that read filtering via  
108 k-mer filtering techniques and read correction can significantly impact the profile

109 of shells. We show that error prone reads can lead to fragmentation of shells in  
110 contrast to the ideal case and can significantly impact the profile of the sample.  
111 We also reason that discarding reads with low abundance k-mers could be a better  
112 approach to prevent fragmented peaks in the KOMB profile as opposed to any  
113 read correction that may introduce noise (Additional File 1, Figure S2). Next, we  
114 repeat the simulated experiment, this time embedding repeats into real microbial  
115 genomes in lieu of a random backbone. In addition to the expected signal, this  
116 introduces some interference from the sequences that we expect to encounter in real  
117 datasets due to the presence of repeats in bacterial genomes. We show that the  
118 peaks containing unitigs bordering the inserted simulated repeats are still observed  
119 clearly with a small shift in shells at which these peaks occur (Additional File 1,  
120 Figure S3).

121 KOMB uses an internal unitig filter where unitigs shorter than read length are  
122 not considered for downstream analysis. Though beneficial in reducing noise while  
123 analyzing isolate genomes, this could cause loss of information in metagenomes or  
124 samples containing closely related strains or species. In such cases, the resulting  
125 de Bruijn graph is expected to be highly fragmented yielding shorter unitigs. We  
126 discuss the effect of unitig filtering in the context of species diversity through sim-  
127 ulations on five closely related *E. coli* strains and reason that unitig filtering based  
128 on length must be turned off in order to capture the complete profile. We also show  
129 the difference in signatures obtained when we have multiple genomes in a sample  
130 that are closely related versus a sample containing more distantly related genomes.  
131 (Additional File 1, Figures S4, S5 and, S6)

132 Lastly, we run KOMB on real metagenomic samples to show both how the shell  
133 profile can be an indicator of the community structure present in the samples as well  
134 as its scalability to handle large metagenomic datasets. We first show the results on a  
135 synthetic metagenomic dataset [43] which allows us to identify community structure  
136 in the presence of ground truth data. We also run KOMB on real metagenomic  
137 samples from the Human Microbiome Project (HMP) and show that samples from  
138 the same body site tend to be more closely matched compared to the samples  
139 from other body sites based on their KOMB profiles. Finally, we run KOMB on  
140 approximately 1TB of longitudinal gut microbiome data to show that KOMB can  
141 help capture and visualize perturbations in microbiome communities.

142 KOMB validation on a simulated *E.coli* and *B.Cereus* sample

143 To validate KOMB on a simple simulated data model, we consider 2 genomes in a  
144 sample, *E. coli* and *B. cereus*. We embed one family of intra-genomic 400×400bp  
145 repeats in *E. coli* and one family of intra-genomic 200×400bp repeats in *B. cereus*,  
146 along with one shared family of inter-genomic 500×500bp repeats. Figure 1 shows  
147 the results on the combined sample as well as the individual genomes of *E. coli* and  
148 *B. cereus* separately. Based on the theoretical analysis (see KOMB profile in the  
149 Methods section), we expect a peak close to 1000 (for the inter-genomic repeats)  
150 and peaks close to shells 400 and 200 as well. Figure 1 shows that we do indeed see  
151 peaks close to 1000 that represent the shared simulated repeats. More interestingly  
152 we see peaks around shell 200 and 400 but also see some discernible peaks between  
153 200-400 and 400-600. These are unitigs with two different types of repeats at their  
154 edges causing a shift beyond the expected number of shells for the intra-genomic  
155 repeats.

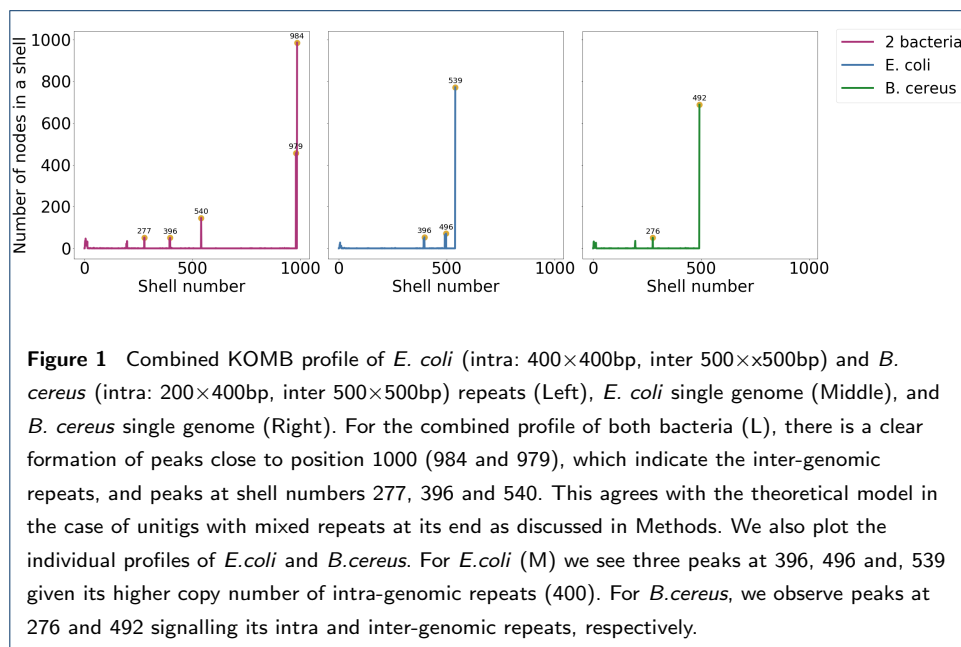

156 In order to validate the signature we receive from the above combined plot of  
157 *E. coli* and *B. cereus*, we create a ground truth dataset of repetitive unitigs by  
158 mapping back the unitigs to the reference genomes. Given that we know the position  
159 of the simulated repeats in the genome, we mark any unitigs mapping to a region  
160 overlapping the embedded repeats into three categories, either inter-genomic repeats

161 or one of the intra-genomic family of repeats. Figure 2 confirms that unitigs in the  
162 highest shell do indeed have inter-genomic repeats at their ends. Also, as expected,  
163 the families of intra-genomic repeats fall in peaks around 200 and 400 and the unitigs  
164 with mixed repeats at their ends form peaks in between those shells. Finally, we  
165 observe that the initial shells have no repeats hitting them. This demonstrates the  
166 ability of KOMB to delineate repeat families while being robust to background  
167 noise.

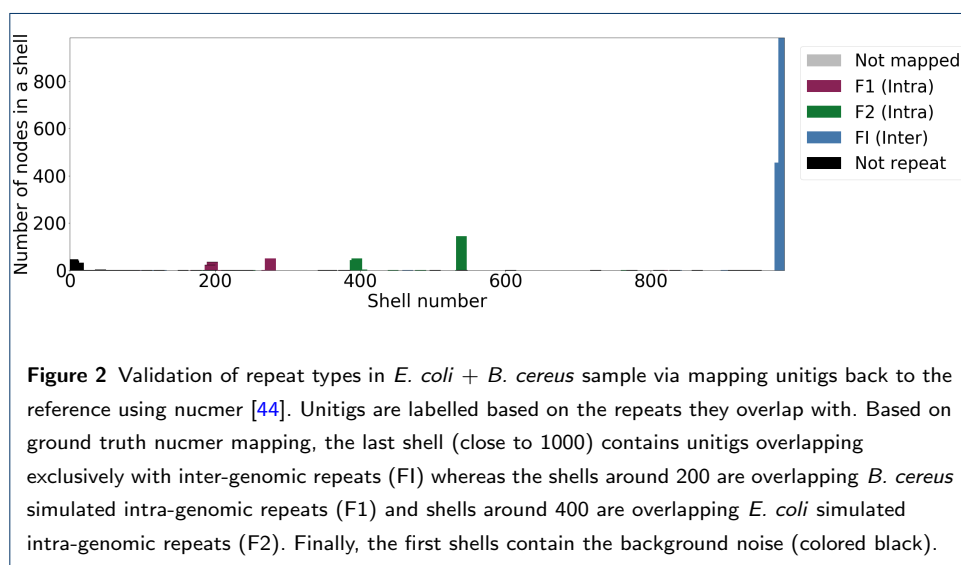

## 168 KOMB on Metagenomes

169 To address the question of visualization and characterization of communities within  
170 metagenomic samples we have run KOMB on a synthetic metagenomic community  
171 of 64 organisms [43] and real metagenomes obtained from the Human Microbiome  
172 Project (HMP) [45] [46]. Finally, we also show that KOMB can reveal shifts in large  
173 scale longitudinal metagenomic studies [47].

### 174 *Synthetic Metagenome Dataset*

175 We ran KOMB on the Shakya et al [43] synthetic metagenome community and  
176 carried out an in-depth analysis of the KOMB profile. The Shakya metagenomic  
177 dataset consists of 64 organisms - 16 archea and 48 bacteria. In order to validate  
178 and analyze KOMB, we also downloaded the reference genomes of all the organisms  
179 in the sample. These 64 genomes were then concatenated into a single fasta file and

180 used as input to nucmer for repeat finding in order to determine the ground truth  
181 (Additional File 1, Section 1.5) .

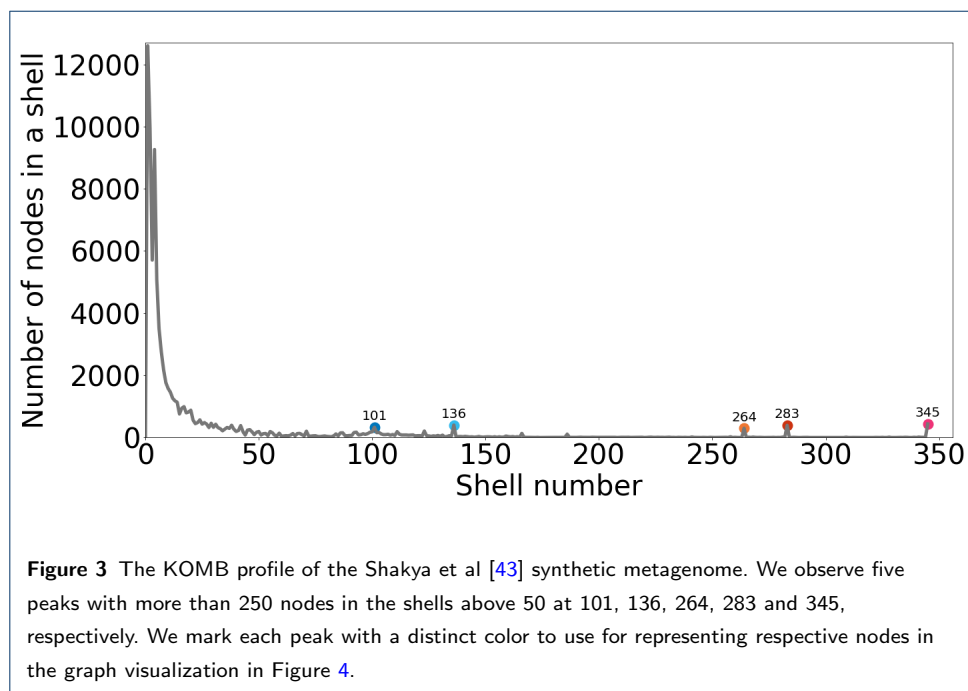

### 182 *Analysis of KOMB Profiles*

183 As part of the preprocessing step in the KOMB pipeline, the paired-end reads were  
184 filtered using the k-mer filter tool from Stacks [48]. We then ran KOMB with no  
185 unitig filter to replicate a run with no prior knowledge of the community structure.  
186 Figure 3 shows the KOMB profile obtained. We observe that, similar to the case of  
187 simulated repeats with a real genome backbone, we obtain some peaks in the initial  
188 shells that represent the inherent background similarities in the genome which decay  
189 as we approach shell number 50. Post the 50<sup>th</sup> shell, we observe 5 distinct peaks in  
190 the profile (marked with colors) at shells 101, 136, 264, 283 and 345, respectively.  
191 Shell 345 is also the last shell of the profile, hence, we find consistent behaviour on  
192 the synthetic metagenome data with our simulated validations that produce a peak  
193 containing inter-genomic repeats. To further closely analyze the graph topology,  
194 we plot the largest connected component of an induced subgraph of the data. The  
195 induced subgraph is constructed such that it only contains the nodes present in  
196 shells above the 50<sup>th</sup> shell where we observe the initial peaks decay. Figure 4 shows  
197 the result of this visualization. We color each of the nodes occurring in our five



198 peaks of interest as dark blue (101), cyan (136), orange (264), red (283) and purple  
199 (345), and use a spring graph layout to plot the graph. We observe that shells 283,  
200 345 and 136 form dense subgraphs whereas the 264 and 101 shells are more spread  
201 out over the connected component. This, in fact, is also a characteristic of K-core  
202 where shells can represent dense subgraphs as well as long-range connections that  
203 are important to the global structure of the graph.

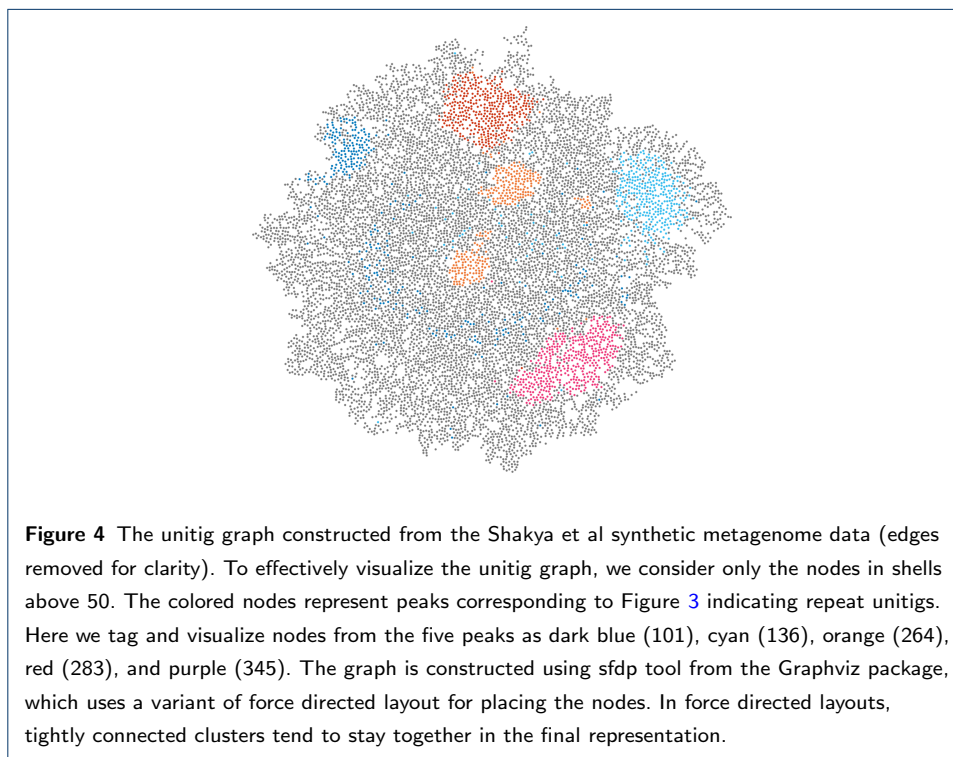

204 We further analyze each of the repetitive unitigs in each of the peaks as well as the  
205 rest of the shells. We first plot the total number of distinct genomes hit by unitigs in  
206 each shell. This gives us information as to whether particular shells are inclined at  
207 identifying inter-genomic homologous regions and which shells capture unitigs that  
208 map predominantly to fewer organisms. In Figure 5, we see a distinctive last shell  
209 spike much like the KOMB profiles, here it indicates that the densely connected  
210 subgraph does in fact represent inter-genomic repeat unitigs. We see some similar  
211 patterns in the early shells after the 50<sup>th</sup> shell cutoff (50-161). For each of the five  
212 peaks observed in the KOMB profile we have the following number of genomes per  
213 shell, 101: 59, 136: 54, 264: 24, 286:17, 345:42. We see that the shells 264 and 286  
214 have significantly less number of genomes per shell, indicating that the majority

215 of the repeats captured by that shell are more intra-genomic rather than inter-  
216 genomic in nature. Unitigs in the last shell mapped to 42 genomes (out of the  
217 total of 64) displaying a larger diversity than that of the intermediate shells and  
218 underlying KOMB's ability to capture high copy number repeat unitigs appearing  
219 across organisms in the metagenome.

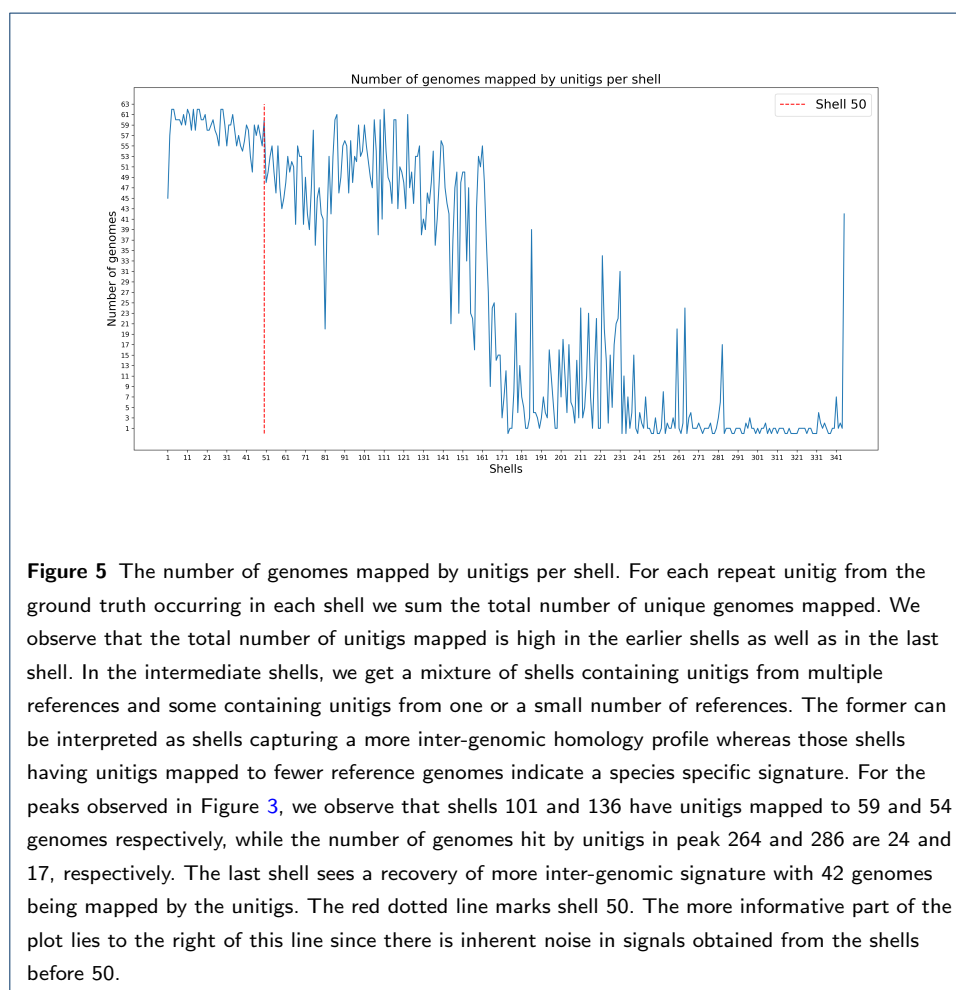

220 We also coin a new metric called repeat density to further analyze the copy number  
221 of repeated unitigs in each shell. We define KOMB repeat density for each shell as  
222 the copy number per genome per unitig. This is a two step calculation. First, for  
223 each repetitive unitig in the shell we sum up its copy number and divide the sum  
224 by the total number of distinct genomes it was mapped to, this gives us the copy  
225 number per genome. Second, we divide this by the total number of unitigs in the  
226 shell (repetitive and non-repetitive) which gives us a measure of how dense is the  
227 repeat information contained in a given shell. This also provides a holistic view of

228 how the copy number per shell normalized by the number of genomes and unitigs  
229 varies across the KOMB Profile. We observe in Figure 6 that the repeat density of  
230 the profile is higher in the higher shells, thus confirming our hypothesis that we are  
231 more likely to capture repeats accurately in the later shells where there is a stronger  
232 signal representing dense subgraphs.

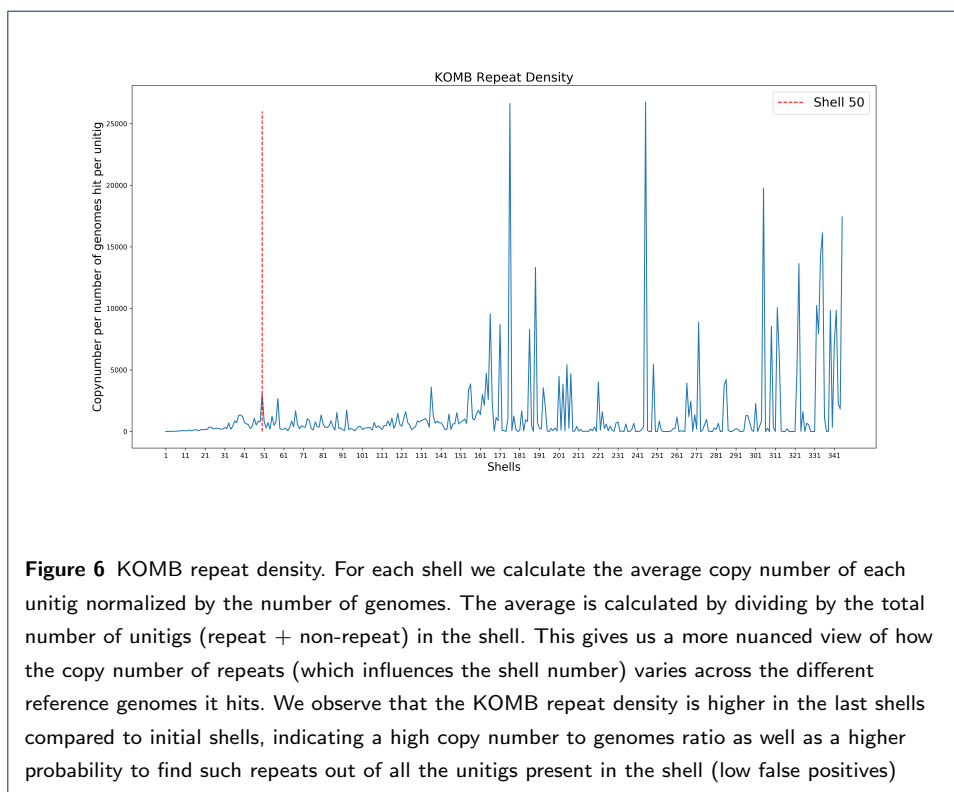

### 233 Human Microbiome Project Samples

234 We have selected 4 distinct body sites among the available samples: external nares,  
235 supragingival plaque, fecal, and bucal mucosa. For each distinct site, we arbitrarily  
236 picked 4 samples, each with between 20,000,000 and 30,000,000 paired-end Illumina  
237 reads. We filtered the read sets by running k-mer filter with k-mer size 21, abundance  
238 threshold 2, and k-mer per read abundance of 80%. Thus, we only retained the reads  
239 that consist of 80% or more of 21-mers that occur at least twice in the sample.  
240 We then ran the KOMB pipeline, with k-mer size 50 used for de Bruijn graph  
241 construction. Since we are likely to encounter some closely related organisms in the  
242 samples, we have turned off unitig filtering. Thus, we have retained the unitigs that  
243 fall below read length in the graph. We then plotted the obtained profiles as stacked

244 violin plots presented in Figure 7. We observe that samples from different sites give  
245 rise to different profiles, as evidenced by Figure 7 zoomed in on the first 40 shells.  
246 We note that while there are outliers present for each site, the overall intra-site  
247 similarity of profiles is high. Furthermore, the inter-site comparison suggests that  
248 the profiles determined by KOMB are distinct for different sites.

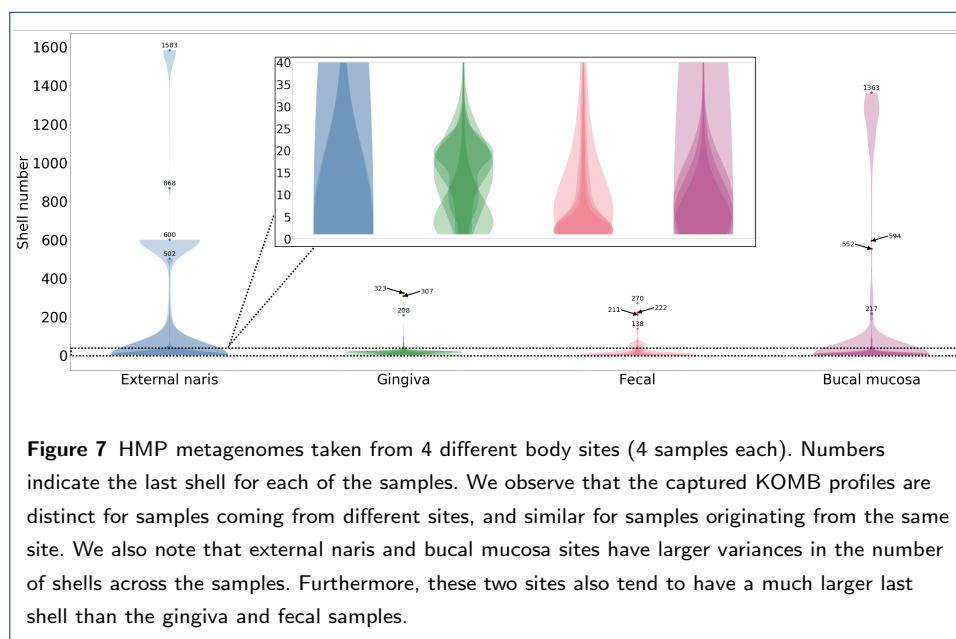

#### 249 Analysis on the Human Gut Microbiome

250 The study of the population diversity and stability of the human gut microbiome  
251 has gained increasing prominence given its impact on disease conditions and various  
252 pathologies [49–51]. Given its importance, it becomes imperative to enable large  
253 scale analysis of gut metagenomes and visualize significant shifts in community  
254 structure, particularly in cases of external perturbation like introduction of dietary  
255 changes or antibiotics. Here, we show that the KOMB profile can offer novel insights  
256 into longitudinal microbiome studies such as that of the human gut.

257 To demonstrate KOMB’s ability to derive insights from large scale metagenomic  
258 analysis, we considered the temporal gut metagenome study by Voigt et al [47].  
259 This study contains almost 1TB worth of human gut microbiome sequencing data  
260 collected from 7 subjects (5 male and 2 female) at different time points spread over  
261 two years. Figure 8 shows the KOMB profiles of each of 6 subjects from the initial  
262 four time points (Days 0, 2, 7 and, 60). Though we ran KOMB on the entire set of

263 reads in this study we exclude one male subject Halbarad from the figure because  
264 the sample at day 60 was missing. According to the study no external disruptions or  
265 sample variabilities were reported for any of the subjects during these time points.  
266 A qualitative analysis of KOMB profiles reveals two important observations. First,  
267 we observe that the general profiles of the gut microbiome closely resemble that of  
268 the fecal samples reported in Figure 7 and are very distinct from other body sites  
269 indicating KOMB's ability to consistently capture body site specific community sig-  
270 natures. Second, we observe a high degree of intra-sample similarity over the three  
271 time points and also observe some fundamental difference between the initial shells  
272 of the profile based on gender, which is also reported by previous studies [52] [53].  
273 The only exception to this trend is the subject Bugkiller which showed significant  
274 variability in the early samples as compared to other male subjects Alien, Peace-  
275 maker and Scavenger which exhibited fairly consistent profiles. We reason that this  
276 deviation could be mostly due to errors or contamination in the sequences as none  
277 of the other 6 samples show such variability. To get a more quantitative understand-  
278 ing of the data and the effects of external disruptions on the gut microbiome we  
279 focus our attention on the subject Alien who was the only subject exposed to an  
280 antibiotic intervention and bowel cleanse procedure during the course of the study.

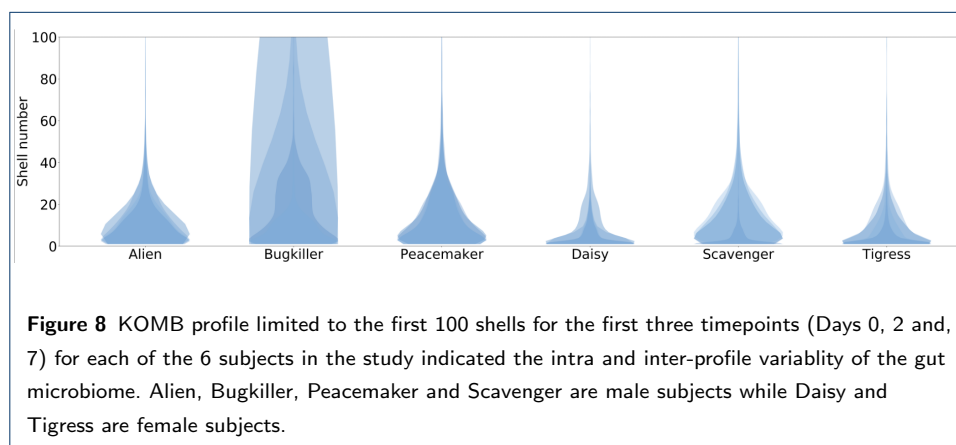

281 Figure 9 outlines the entire longitudinal trajectory of the Alien's gut microbiome  
282 over the course of 14 time points spread across two years. The KOMB profiles focus  
283 on the first 200 shells at each time point. We observe a significant compression  
284 of shells on Days 376, 377, 378, and 380 which coincides with samples taken post  
285 antibiotic intake and corresponding to a significant perturbation to the diversity and

286 community composition as reported in the study. This is also mirrored in the unitig  
287 count of the samples which is decreased by an order of magnitude. It is important  
288 to note here that the total number of reads in the individual time points are similar  
289 and, hence, the difference in the number of unitigs is more likely to be caused by  
290 shifts in the composition of the microbiome. We see that antibiotic intervention  
291 causes not only a reduction in the total number of shells but also alters the unitigs  
292 present in the initial shells, though this tends to recover slightly towards the end  
293 of the antibiotic cycle on Day 380. We also observe complete unitig distribution  
294 recovery in the initial shells twelve days after the last post-antibiotic sample on  
295 Day 392. Following this, the number of unitigs recovers close to earlier levels by  
296 Day 600. We observe similar but less drastic shell compression and quick recovery  
297 after bowel cleanse indicating that antibiotics cause a far greater disruption in  
298 microbiome community structure, a finding corroborated by the authors in Voigt  
299 *et al* [47] as well as an earlier study [54].

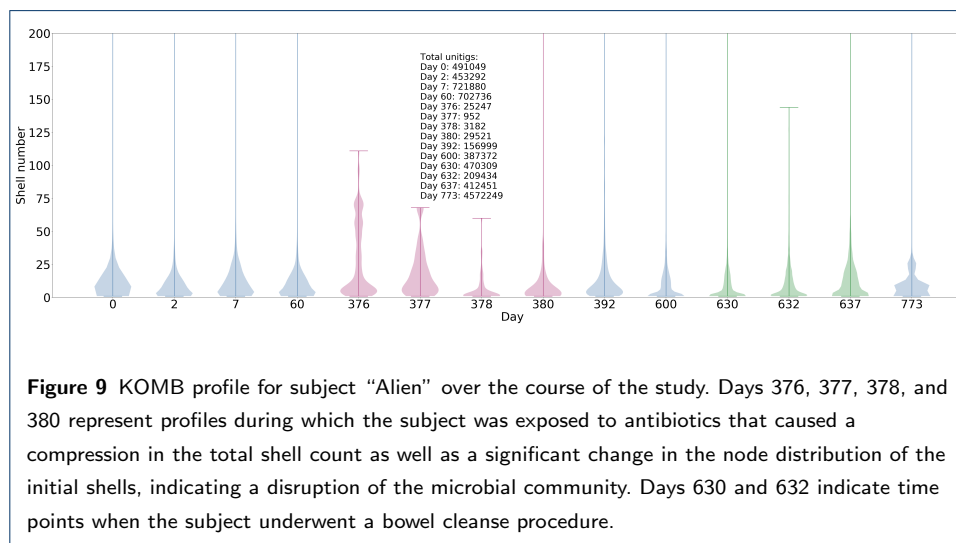

300 To further gauge if the perturbation caused was significant, we calculated the  
301 total variation of probability measure between the shell profiles (normalized to 1).  
302 Figure 10 shows the pairwise distances as calculated by the proposed measure.  
303 More precisely, for discrete probability distributions  $P$  and  $Q$ , the distance  $\delta(P, Q)$   
304 between them is computed as  $\delta(P, Q) = \frac{1}{2} \|P - Q\|_1 = \frac{1}{2} \sum_{w \in \Omega} |P(w) - Q(w)|$ ,  
305 where  $\Omega$  is the (discrete) sample space [55]. To get a better estimate of the difference  
306 between each probability distribution we grouped samples from three of the subjects

307 Alien, Bugkiller and Peacemaker according to time points, namely initial comprising  
308 Days 0, 2, 7, and 60, post-antibiotic comprising Days 376, 377, 378, and 380, and  
309 only from Alien and later comprising Days 392 (3 samples) and 773. We aimed  
310 to reason that the distance between Alien initial and Alien post-antibiotic was  
311 significantly greater than a change that could be explained merely by a difference in  
312 time duration. Indeed, we observe that Alien post-antibiotic has significantly greater  
313 pairwise distance to all other samples (Avg dist = 0.622). This also happens to be far  
314 more than the distance between samples of subjects at initial and later time points  
315 (Avg dist = 0.312). Observing samples collected from Alien, the average pairwise  
316 distance between Alien initial and other samples (excluding Alien post-antibiotic)  
317 is 0.227 and that between Alien later and other samples (excluding Alien post-  
318 antibiotic) is 0.38. The distance confirms our hypothesis that antibiotic intervention  
319 does in fact cause significant perturbation in KOMB profiles. Apart from total  
320 probability measure, we also implemented other distances between probabilities  
321 distributions such as the Earth mover's distance [56, 57] and KL Divergence [58].  
322 Similar findings were obtained with these alternative distances; see Additional File  
323 2, Figures S1, S2 and S3 for more details.

#### 324 Performance

325 KOMB is written in C++ and Python. It uses the igraph C graph library [59]  
326 for the unitig construction and K-core decomposition implementations. KOMB also  
327 uses OpenMP support [60] to use multi-threading wherever available to increase the  
328 efficiency of the unitig graph construction step to ensure its scalability to a large  
329 number of metagenome samples. Table 1 shows the runtime and memory usage of  
330 KOMB on the datasets used in our study. The experiments were run on a server  
331 with 64 Intel(R) Xeon(R) Gold 5218 CPU @ 2.30GHz processors having 372 GB of  
332 RAM. We observed that KOMBs memory usage and runtime largely depend on the  
333 number of reads. ABySS unitig generation is the most memory intensive step in the  
334 pipeline while read mapping using bowtie2 is the most computationally intensive  
335 step in the pipeline. We observe that in the case of Shakya and HMP there is a large  
336 memory difference despite having similar numbers of reads. We reason that this is  
337 likely due to the de Bruijn graph size and topology difference as the peak occurs  
338 during the ABySS stage. Nevertheless, we observe that KOMB can run on samples

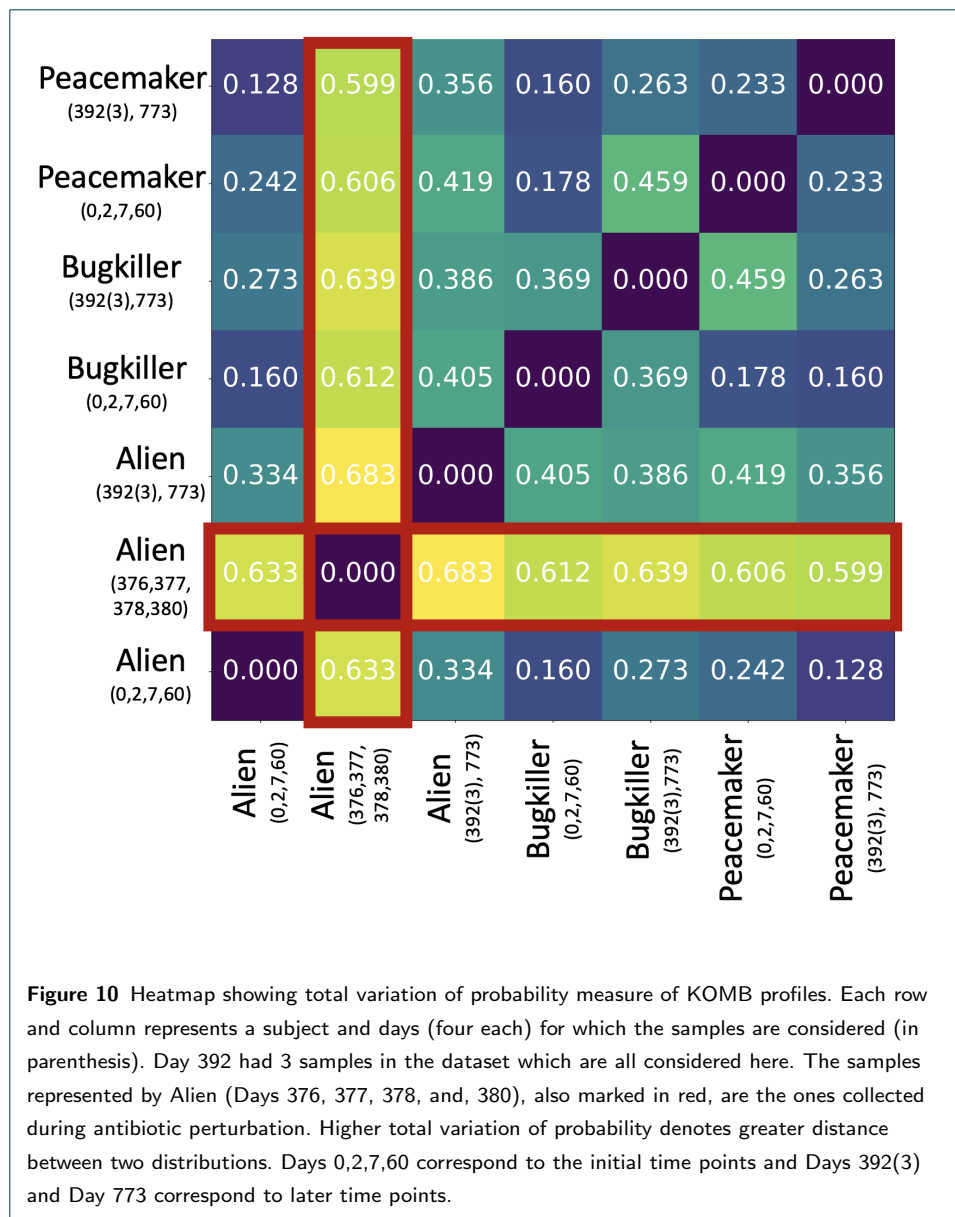

339 with a large number of reads and can process 4 samples of HMP data in under 50  
 340 minutes and the Shakya synthetic metagenome (64 organisms) in 79 minutes. If run  
 341 sequentially, the temporal gut microbiome data (70 samples, 1TB of data) can be  
 342 run in approximately 2 days. As KOMB is also extremely memory efficient, one can  
 343 process multiple metagenomic samples simultaneously on any modern workstation  
 344 to reduce the runtime on entire datasets even further.



**Table 1** Time and memory usage for KOMB. SSG: Simulated single genome; EBG: *E. coli* and *B. cereus*. EBSG: *E. coli*, *B. cereus* and *S. aureus* genomes; 5EG: Five genomes of closely-related *E. coli* strains; Shakya: Shakya et al (2013); HMP (I); individual HMP samples; HMP (A); combined HMP samples and TGM(Av); average across Temporal Gut Microbiome samples. Read filtering is treated as a pre-processing step, therefore the time and memory usage for it is not reported in this table.

| Dataset  | Performance metrics |         |           |            |             |          |
|----------|---------------------|---------|-----------|------------|-------------|----------|
|          | Reads               | Nodes   | Edges     | Wall clock | CPU time    | RAM      |
| SSG      | 625,000             | 1,336   | 159,060   | 79.46s     | 26m42s      | 1.54 GB  |
| EBG      | 1,256,682           | 5,127   | 991,019   | 178.98s    | 71m50s      | 2.00 GB  |
| EBSG     | 1,609,352           | 9,708   | 2,512,192 | 4m37s      | 132m31s     | 2.22 GB  |
| 5EG      | 3,453,508           | 40,769  | 162,606   | 4m12s      | 84m24s      | 2.60 GB  |
| Shakya   | 53,997,046          | 160,083 | 1,767,445 | 79m36s     | 1814m43.80s | 38.35 GB |
| HMP (I)  | 14,007,285          | 74,918  | 4,093,367 | 14m42s     | 211m7.2s    | 3.64GB   |
| HMP (A)  | 56,029,140          | 409,370 | 7,496,925 | 47m41.95s  | 1995m24.6s  | 18.09 GB |
| TGM (Av) | 26,520,076          | 776,058 | 7,286,158 | 44m41s     | 810m48s     | 20.22GB  |

## 345 Discussion

346 Identifying and visualizing homologous regions in metagenomes using current tools  
347 based on assembly graphs and contig graphs is often challenging as these graphs  
348 contain tangled intra-genomic and inter-genomic repeats. K-core decomposition can  
349 give accurate information capturing unitigs that have repeats, which can be visu-  
350 alized as peaks in a histogram. A peak indicates a dense subgraph of nodes in the  
351 unitig graph representing nodes connected to other homologous nodes, enabling an  
352 easy extraction for the purposes of assembly or scaffolding.

353 We outline the novelty of KOMB, both as a theoretical approach and as a usable  
354 tool. KOMB addresses some of the limitations of the previously used approaches  
355 based on contig graphs and betweenness centrality to identify both intra and inter-  
356 genomic repetitive structures in metagenomes. In contrast, KOMB constructs a  
357 unitig graph that captures edges within and between genomes, representing a more  
358 holistic network for homology detection. This prevents shortcomings occurring as a  
359 result of collapsing bubbles or branches by many modern assemblers, which leads  
360 to a loss of homology information among unitigs. K-core decomposition is also a  
361 natural choice to separate repeats based on their abundances as proved by our the-  
362 oretical validations and is agnostic to the length of the individual repeat families.  
363 Though in our results we have shown that the background genome can have some  
364 baseline repetitiveness (low copy number), the end user can – based on the down-  
365 stream applications – choose any particular shell as the cutoff to mark the unitigs  
366 as repeats, and can thus integrate KOMB into their pipeline. KOMB is also signifi-

367 cantly different from k-mer frequency based approaches. Though k-mer frequencies  
368 can provide general information on unique vs repetitive k-mers in a sample, KOMB  
369 more holistically captures information based off of read mapping that connects net-  
370 works of similar genomic regions, which in turn represent intra and inter-genomic  
371 homology. Often, in metagenomic applications and assembly approaches, identify-  
372 ing contigs with highly repetitive k-mers and high coverage is a proxy for identifying  
373 repetitive contigs. KOMB, however, is an exact approach that provides information  
374 for scaffolding and exploration of the graph-based structure of the community.

375 Our results favorably support the utility of KOMB for the identification of homol-  
376 ogous regions in real metagenomic samples. Though KOMB represents a promising  
377 new approach for elucidating genome dynamics within metagenomes, there still exist  
378 several challenges to develop a further understanding of how to interpret metage-  
379 nomic community profiles and the separation of homologous regions in samples of  
380 varying diversity and abundance. To this end, we have classified future investiga-  
381 tion into three separate categories. First we discuss extending our current theoret-  
382 ical framework to deconstruct and interpret the K-core decomposition results in  
383 a more intuitive fashion. We also discuss possible challenges that need to be ad-  
384 dressed to interpret information on unitigs in higher shells that may not necessarily  
385 be peaks. Second, we focus on extending functionalities to a wider variety of input  
386 data, specifically long read data and other overlap graph types. Finally, we discuss  
387 possible approaches to further optimize the runtime and memory requirements.

### 388 *Improving theoretical validation on metagenomes*

389 In our validation on simulated genomes we have addressed the effects of identical  
390 simulated repeats on the K-shell profile of genomes and metagenomes. However,  
391 there exist some important limitations to our study. First, all repeats within the  
392 same repeat family were constructed to be identical. This is not necessarily the  
393 case in real genomes, since two regions can contain a few base pair differences  
394 yet be considered repeats from the biological standpoint. Though the results on  
395 synthetic and real metagenomic data containing such repeats have been promising,  
396 we are planning to extensively test KOMB with simulated homologous but not fully  
397 identical repeats in the future.

398 Second, we have been using multinomial distribution to space out the repeats  
399 throughout the backbone. However, in the real genomes, repeats can be less uni-  
400 formly distributed with an extreme case being the tandem repeats. It is important  
401 to analyze these cases both in terms of the resulting topology of the graph, and in  
402 terms of our method's performance in these scenarios.

403 Third, we have considered repeats of lengths 200, 400, 500, 700 and 1000 base  
404 pairs. In a real genome, the length of a repeat can be significantly smaller or larger  
405 [61] [62], which further complicates the picture. As now some of the repeats will be  
406 causing shifts in the graph topology and manifest as increased background signal  
407 in the corresponding profile. However, other repeats will still be cleanly appearing  
408 as peaks. Deconvolution of such mixed signal in the general setting is an extremely  
409 complex problem and one that may need a combination of other graph theory and  
410 signal processing approaches. However, we aim to understand some of the simpler  
411 scenarios which have enough biological motivation. KOMB may also be prone to  
412 accumulating noisy unitigs in the higher shells as a result of being adjacent to  
413 repeat unitigs. Hence, a further filtering process within the shells would enable  
414 greater specificity of repeat unitigs [63].

415 One of the ways to tackle these questions will be to analyze the effects of real-  
416 world repeat patterns on the shell profiles in the simulated setting. Embedding real  
417 repeats into increasingly more complex simulated backbones, will give us a different  
418 viewpoint on the shell profiles. It will also improve our overall understanding of the  
419 repeat induced profiles and provide a way to further deconvolve the signal obtained  
420 from metagenomic datasets.

#### 421 *Extending functionality*

422 Currently, KOMB supports paired-end short reads as the input. However, we also  
423 have the capability of inputting graphs directly by using the GFA format. Graphs  
424 directly derived from the de Bruijn graph, such as the unitig overlap graph produced  
425 by SPAdes, do not have enough signal for effective KOMB processing. On the other  
426 hand, read overlap graphs obtained from long read datasets can potentially yield  
427 interesting results when processed with KOMB. Fully extending the pipeline to  
428 capture those cases and enable the effective analysis of long read datasets is one of  
429 the directions we plan to pursue in the future work.

430 *Optimizing performance*

431 KOMB performs highly efficient parallel graph construction and K-core decom-  
432 position. However, the memory requirements of the pipeline still calls for usage of  
433 workstations for processing metagenomic datasets. While this is customary for soft-  
434 ware working with paired-end read data, we are looking forward to supporting long  
435 read data and smaller personal devices. We plan to address this in future releases  
436 by fine tuning initial steps of the pipeline to allow low memory footprint execution.  
437 Together with compact long read sequencers, this would enable usage of KOMB as  
438 a quick profiling tool outside of the research laboratory environments.

439

440 **Conclusions**

441 In this paper, we present KOMB - an efficient and scalable tool to identify repeti-  
442 tive regions in metagenomes. We present a rigorous analysis of KOMB on simulated  
443 and synthetic data to capture consistent and accurate peak signatures representing  
444 repetitive unitigs. Another feature of KOMB, as shown by our validation exper-  
445 iments, is that the signals obtained are robust to confounding noise occurring as  
446 a result of read errors and insert size variability. This noise can be corrected to  
447 obtain near ground truth signals. We also show, through our experiments on real  
448 metagenomic samples, that KOMB profiles can be used as an indicator for sam-  
449 ple specific signatures and diversity, with promising applications to a wide array of  
450 metagenomic analyses.

451 **Methods**

452 In this section, we describe the methodology behind KOMB and the various software  
453 tools and algorithms used in the pipeline. KOMB makes use of three popular bioin-  
454 formatics software tools, namely k-mer filter [48] for read correction as an optional  
455 pre-processing step, ABySS [64] or SPAdes [65] for efficient de Bruijn graph creation  
456 and unitig construction, as well as Bowtie2 [66] for fast and accurate read mapping.  
457 In addition to this, our tool uses the igraph C package [59] and OpenMP [60] li-  
458 braries for the K-core implementation and the fast parallel construction of the unitig  
459 graph, respectively. KOMB offers two primary operation modes. Users can either  
460 use the KOMB unitig builder pipeline which relies on ABySS [64] for de Bruijn  
461 graph construction and unitig generation or alternatively use the SPAdes unitig

462 generator which can output a unitig graph directly in the GFA format. We can use  
463 the GFA output directly as an input to KOMB. Using the SPAdes graph output is  
464 much faster since we avoid the graph construction step of the algorithm. However,  
465 the resulting graph only connects unitigs based on the k-mer overlap. This results in  
466 a highly compressed shell profile and weak signal for KOMB analysis. Thus, we will  
467 be using the ABySS unitig construction step in all analyses that follow. Another use  
468 for the GFA extension is that it provides users with a way to input an overlap graph  
469 or any assembly or contig graph directly into KOMB and visualize the results of the  
470 analysis. This can be particularly useful for overlap graphs constructed from long  
471 read data. For the purpose of comparing different read pre-processing methods we  
472 also use the short read correction tool Lighter [67]. The paired-end read simulator  
473 wgsim [68] is used for all simulated experiments.

#### 474 Pipeline

475 In order to understand the workflow, we first describe a unitig graph. A unitig is  
476 a maximal consensus sequence usually obtained from traversing a de Bruijn graph.  
477 Unitigs by definition terminate at branches caused by repeats and variants, and  
478 unlike contigs, are non-overlapping. Before constructing the set of unitigs, we run  
479 the previously described k-mer filter as a preprocessing step. The first filtering step  
480 is iterating through all reads and counting occurrences of each k-mer, in our case the  
481 k-mer size is 15. A k-mer is marked as abundant if it occurs in the dataset more than  
482 twice. The next step is iterating through the reads again, and considering the k-mers  
483 present in each read separately. If less than 80% of k-mers in the read are abundant,  
484 then we discard the read. For the purposes of this work, the unitig graph refers to a  
485 graph having unitigs as its vertices and the edges being representative of adjacent  
486 or homologous unitigs. After the unitigs are obtained, in our case performed by  
487 running ABySS on the corrected reads, we follow three additional steps for careful  
488 construction of unitig graphs from short paired-end read data (Fig.11). First, all  
489 of the reads are mapped to unitigs by Bowtie2 using its sensitive global alignment  
490 module. Each read of a read pair (forward and reverse) is mapped individually  
491 and we allow for a maximum of 1000 alignments per read (this parameter can be  
492 adjusted by the user). We also trim the tail of both pairs to ensure that we get  
493 accurate alignments. The number of base pairs that we trim off the ends of the

494 reads is equal to the difference between the read length and the k-mer size used  
495 to construct the de Bruijn graph. As a secondary filtering step, we also filter out  
496 mapped reads without a pair as well as read pairs mapped to one unitig. This allows  
497 us to only consider reads with paired-end information and speeds up the process of  
498 unitig graph construction. Second, for each read we create a set of all unitigs that  
499 mapped to that read. For a given forward and reverse read pair, we also check if  
500 each individual read in the pair mapped to different unitigs, which would represent  
501 potentially adjacent unitigs in the genome. In this way, for a given read pair we have  
502 unitigs associated with each read, e.g., in Fig. 11 unitigs 1, 3, and 8 are associated  
503 with one read of the purple pair whereas unitig 4 is associated with the other read.  
504 We then connect all the unitigs associated with a specific read pair (nodes 1, 3, 4,  
505 and 8 for the purple read pair) where we distinguish between the notion of a vertical  
506 edge, i.e. an edge linking unitigs associated with the same read such as 1 and 3,  
507 and a horizontal edge, i.e. an edge linking unitigs mapped to different reads in the  
508 same pair such as 1 and 4.

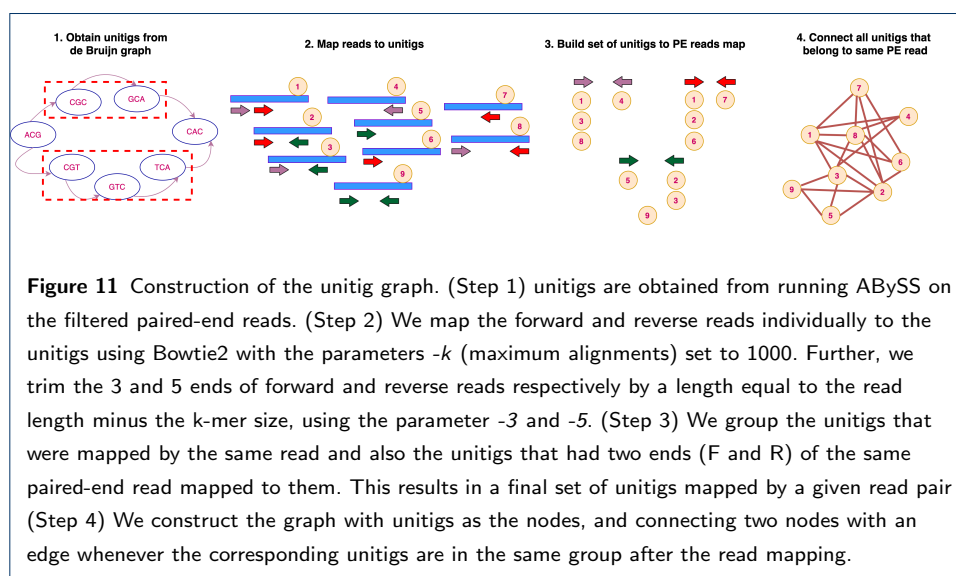

### 509 *K*-core decomposition

510 *K*-core decomposition is a popular graph-theoretical concept used in network science  
511 to identify influential nodes in large networks [69–71]. It has been previously shown  
512 to accurately calculate node influence in Susceptible-Infected-Recovered (SIR) net-  
513 work models in epidemiological studies [63]. *K*-core decomposition partitions the

514 node set of a graph into layers (or shells) from more peripheral to more central  
515 nodes. More precisely, the  $K$ -core of a graph is defined as the maximal induced  
516 subgraph where every node has (induced) degree at least  $K$ . Based on this se-  
517 quence of  $K$ -cores, we say that a node belongs to the  $K$ -shell if it is contained in  
518 the  $K$ -core but not in the  $(K+1)$ -core. For any given graph, one can iteratively and  
519 efficiently decompose it into shells with complexity  $O(V + E)$ , which is significantly  
520 faster than the computation of most exact centrality measures. This makes it ef-  
521 fective for decomposing large and dense networks. Several implementations of the  
522  $K$ -core decomposition have been proposed. In this work, we rely on the igraph C  
523 package [59], which implements a variation of the algorithm proposed in [72]. In  
524 contrast to centrality-based methods, the  $K$ -core algorithm identifies densely con-  
525 nected cliques and groups them into shells. Fig. 12 shows the decomposition of a  
526 toy graph into its  $K$ -shells. Fig. 13 shows the complete pipeline of KOMB as a  
527 flowchart.

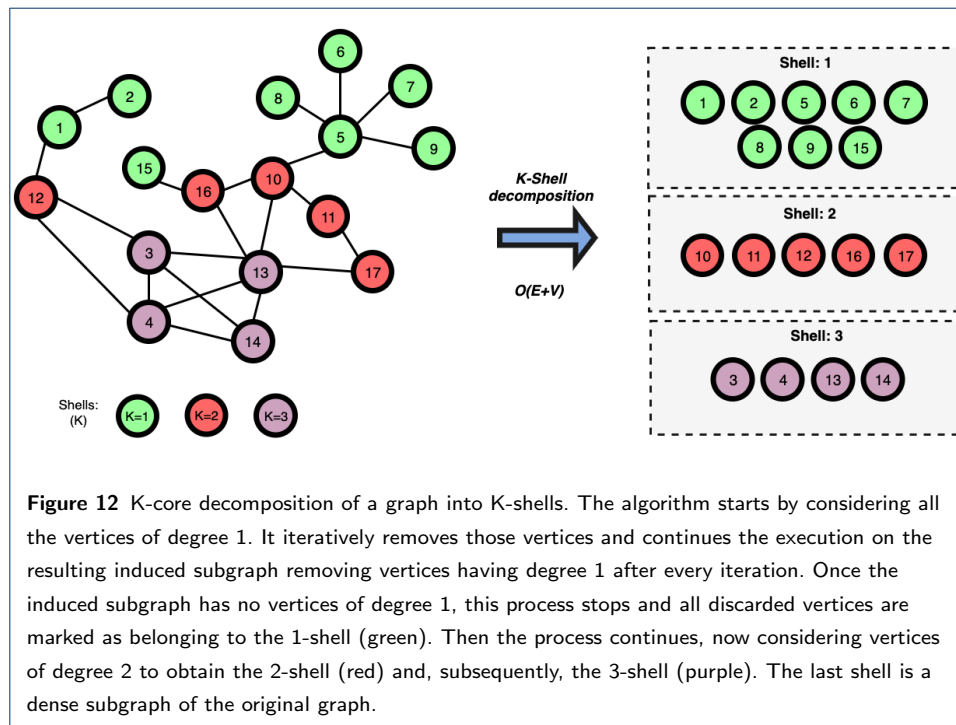

## 528 KOMB profile

We refer to the output of KOMB either as a KOMB profile or as the shell profile of a given sample. This is visualized as a bar plot depicting the number of nodes

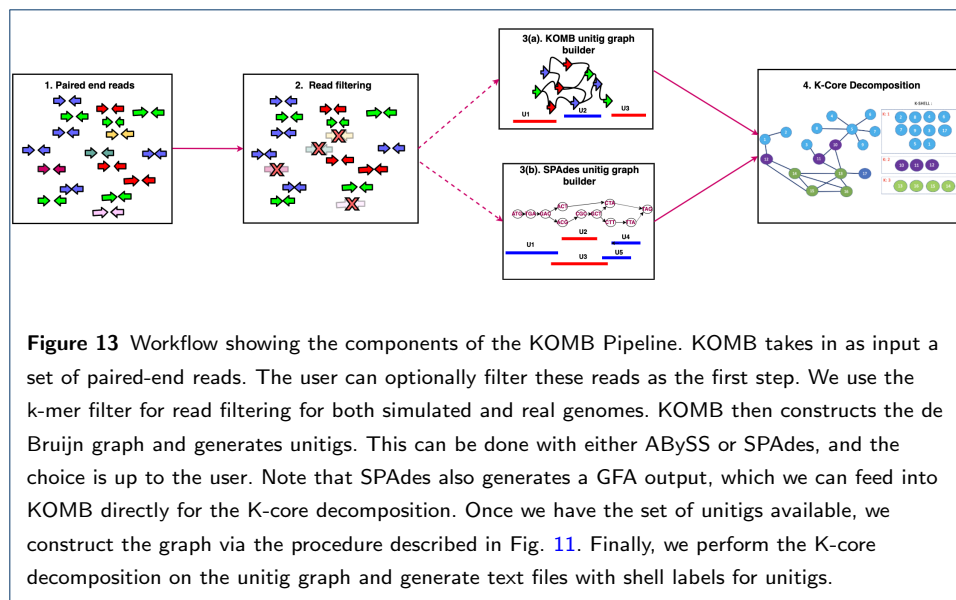

per shell. As the read error, insert sizes, diversity, community structure, and sample sizes vary, we expect a corresponding shift in the bar plot as each of these conditions would alter the node distribution in shells. In Results, we have presented simulated experiments varying the above mentioned conditions that corroborate this hypothesis. Here, we present a theoretical analysis to calculate shifts in peaks occurring as a result of having two distinct repeat families through an example. Each shell  $k$  obtained after K-core decomposition is an induced subgraph of degree  $k$  which may or may not be disconnected. In a unitig graph, based on our construction, these would contain regions of shared homology or repetitive regions and  $k$  would depend on the abundance or copies of these shared region across the genomes in the sample. These shells containing repetitive or homologous regions tend to occur as distinct peaks at higher shells versus the rest of the background. By definition, the background contains regions more sparsely connected. Given a simulated experiment, it is possible to theoretically ascertain the shells at which we expect discernible peaks. For example, if we have a repeat  $R_1$  with copy number  $K$ , then based on our read mapping and unitig construction steps we would expect a peak in the  $K^{\text{th}}$  shell. This would contain all unitigs having an overlap of  $k$  with the repetitive region, where  $k$  is the k-mer size used to generate the de Bruijn graph. The case is a little more complex when we have two families of repeats  $R_1$  and  $R_2$  with copy numbers  $K_1$  and  $K_2$  respectively. Depending on the placements of the repeats we can classify



the unitigs obtained into different classes based on the family of repeat it overlaps at its breakpoints; see Fig. 14. We have 3 possible categories of unitigs as shown in the figure depending on the repeats at the ends of the unitig. Category 2 in the figure refers to unitigs with both repeats at its ends. An important observation here is that according to our graph construction method, a node in this category will be connected to other nodes in the same category as well as all nodes in the other categories as it carries both repeats. We can estimate the expected number of unitigs in each of the categories as follows: Let  $N_1$  be the number of unitigs overlapping the repeat  $R_1$ ,  $N_2$  be the number of unitigs overlapping the repeat  $R_2$ , and  $N_M$  be the number of unitigs overlapping both repeats. Assuming uniform probability distribution over all possible permutations of repeats in the genome, we obtain the following expected values:

$$\begin{aligned}\mathbb{E}(N_1) &= \frac{|R_1|(|R_1| - 1)}{|R_1| + |R_2| - 1} \approx \frac{|R_1|^2}{|R_1| + |R_2|}, \\ \mathbb{E}(N_2) &= \frac{|R_2|(|R_2| - 1)}{|R_1| + |R_2| - 1} \approx \frac{|R_2|^2}{|R_1| + |R_2|}, \\ \mathbb{E}(N_M) &= \frac{|R_1||R_2| + |R_2||R_1|}{|R_1| + |R_2| - 1} \approx \frac{2|R_1||R_2|}{|R_1| + |R_2|}.\end{aligned}$$

529 Subsequently, in the case when the insert is larger than the length of the repeat  
530 and given enough paired-end reads, we should observe two peaks in the shell profile,  
531 namely, we will have a peak at  $\mathbb{E}(N_1) + \mathbb{E}(N_M)$  and another one at  $\mathbb{E}(N_2) + \mathbb{E}(N_M)$ .  
532 These two shells are obtained since the unitig graph would consist of two overlapping  
533 cliques, one of size  $\mathbb{E}(N_1) + \mathbb{E}(N_M)$  and another one of size  $\mathbb{E}(N_2) + \mathbb{E}(N_M)$ , with an  
534 overlap of size  $\mathbb{E}(N_M)$  (represented in Figure 14 with red and black lines). However,  
535 notice that when the insert size is shorter than the length of the repeat, the two  
536 types of unitigs overlapping both repeats would not be connected between them in  
537 the graph (represented in Figure 14 with black lines only). This results on a shift  
538 in the position of the second shell.

### 539 Comparison to other repeat identification methods

540 A novel feature of our study is using unitig graphs to analyze repetitive regions  
541 in metagenomes using K-core decomposition in contrast to contig graph commonly  
542 used in previous approaches like MetaCarvel [31] and Bambus [25]. While our fo-  
543 cus is on metagenomic repeat detection, it is worth discussing other graph based

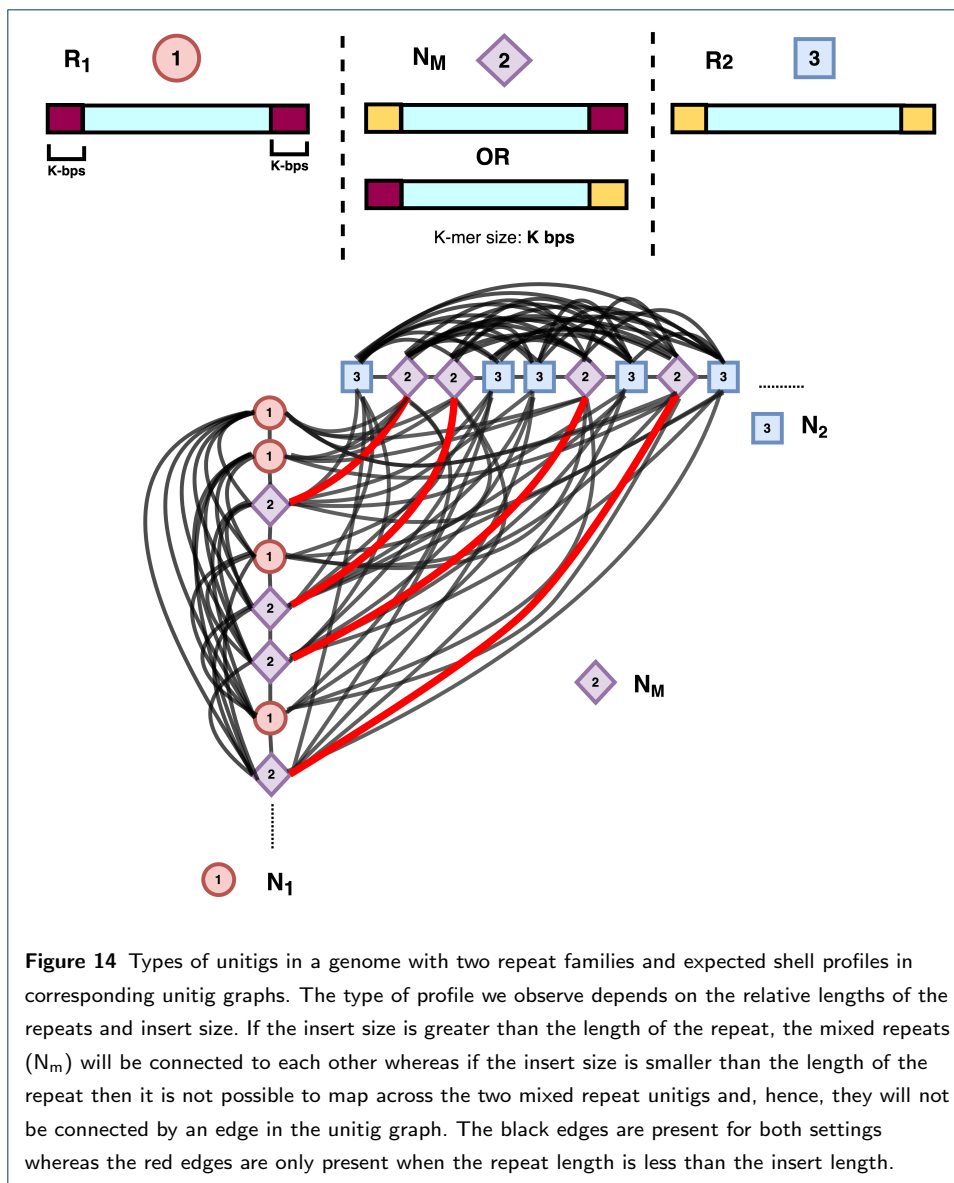

544 tools that been previously applied for repeat detection in isolate genomes. A graph  
 545 based hierarchical agglomerative clustering [73] approach was suggested by Novák  
 546 et al [74] and used the Fruchterman and Reingold algorithm [75] to help visual-  
 547 ize reads with similarities, but its quadratic time complexity  $O(V^2 + E)$  makes it  
 548 difficult to scale to large metagenomic datasets. Recently, two tools, namely, REPde-  
 549 novo [76] and REPLong [77] have used underlying contig graph based structures for  
 550 repeat identification. Both these methods have been applied to eukaryotic genomes  
 551 to ascertain repetitive regions. REPdenovo uses abundant k-mers and assembles  
 552 them to repeat contigs. It then further stitches repeat contigs into longer consensus

553 repeats and uses coverage based information to filter non-specific repeat contigs.  
554 An important point to note is that the formation of larger consensus repeats from  
555 raw repeat contigs is very similar to scaffolding where a directed raw contig overlap  
556 graph is constructed and then a topological sort is carried out on each strongly  
557 connected component to obtain a linear order of raw unitigs. The traversal of the  
558 graph to identify long consensus sequences is then carried out by using path finding  
559 heuristics. REPLong, on the other hand, is a more recent tool and is specific to long  
560 read data. It uses the concept of community detection in long read overlap graphs  
561 to construct repeat libraries. In addition to graph-based approaches, an alternative  
562 method to efficiently identify repeats on large genome scale datasets is by using  
563 k-mer frequency estimation, which accounts for both identical and nearly identical  
564 k-mers to identify repeats. Examples of these include ReAS [78], RepeatScout [79],  
565 WindowMasker [80], Repseek [81], Tallymer [82], RED [83], RepARK [84] at the  
566 genome level and more recently at short read level RF [85] identification  $D_2^R$  statis-  
567 tic [86] based on a variation of the  $D_2$  statistic that have been previously used  
568 for sequence comparison [87–89]. K-mer frequency based approaches depend on  
569 identifying candidate k-mers that may contain repeats based on their statistical  
570 significance compared to background. Most k-mer based repeat identification tools  
571 have shown to capture a small subset of specific repeats and size, mainly either  
572 transposable elements (TE) or tandem repeats (TR). RED can detect both TE  
573 and TR with greater sensitivity in both bacterial and eukaryotic genome including  
574 the Human genomes [83]. RepARK creates de-novo repeat libraries by identifying  
575 abundant k-mers which are then assembled by a de novo genome assembly pro-  
576 gram (such as Velvet) into repeat consensus sequences. While these k-mer based  
577 tools have been shown considerable accuracy in identifying repeats, these have only  
578 been applied to assembled and un-assembled isolate genomes. Thus, their use case  
579 in metagenomic samples where repeats may be both intra and inter-genomic with  
580 varying abundances is extremely limited and remains untested. The recently in-  
581 troduced  $D_2^R$  statistic can be applied to metagenomes directly and is a read level  
582 mapping tool that indicates a measure of repetitiveness in a given read. This method  
583 was tested on real metagenomes and could aid the identification of CRISPR sites  
584 with high accuracy. Though indicating the presence and absence of repeats is infor-  
585 mative, the  $D_2^R$  statistic on read level repeat information is more suited to identify

586 short regions consisting of clearly defined and distinct motifs. There still exists a  
587 need for a more rigorous theoretical basis that generalizes over different kinds of  
588 repeats and community diversity in metagenomes where there are far more varied  
589 and often confounding repeat structures of larger lengths that are highly sample de-  
590 pendent. Another potential drawback is that reads are often noisy and error prone  
591 and have some inter-sample variability which may affect its performance.

592 In contig graph approaches, methods based on betweenness centrality have been  
593 the preferred choice to mark repetitive contigs. This approach, though specific, has  
594 not achieved high levels of sensitivity and often tends to miss out on a lot of repet-  
595 itive contigs. This served as the core basis for further investigations in this study.  
596 To the best of our knowledge, KOMB is the first tool using K-core decomposi-  
597 tion on unitig graphs. In order to understand the advantages of our approach, it  
598 is imperative to understand topological differences captured by different methods.  
599 Most modern assemblers tend to collapse information obtained by a single read  
600 mapping to multiple unitigs. This tends to affect the vertical edges in the graph  
601 that we discussed when describing Fig. 11. This graph simplification often leads  
602 to loss of information of homologous regions present in other parts of the genome  
603 and can affect sensitivity. Moreover, as contigs contain repeat regions, paired-end  
604 data tends to reveal very little information about the presence of repeats within the  
605 contig. These structures in the contig graph tend to resemble a single node (col-  
606 lapsed branches) having a high degree and centrality. But the centrality threshold to  
607 mark repeats is hard to ascertain and arbitrary thresholds may lead to sub-optimal  
608 repeat detection. This is a key difference of unitig graphs in KOMB as compared  
609 to contig graphs in MetaCarvel. Contig graphs are connected only on paired end  
610 read information. Though appropriate for scaffolding, this feature precludes the  
611 successful identification of homology. In contrast, KOMB takes into consideration  
612 all unitigs mapped by the same read, preserving homology information, while also  
613 preserving positional information through paired mapping where (given sufficient  
614 insert size) links can connect two adjacent unitigs bordering the same repeat. In  
615 this way, all unitigs having repeats on their edges tend to form dense subgraphs  
616 which can be efficiently detected using K-core decomposition, yielding clear peaks  
617 at shells containing repetitive unitigs. Hence, a unitig graph can be thought of as a  
618 richer graphical representation to identify repetitive structures in metagenomes and

619 K-core decomposition offers the most efficient and exact method to recover these  
620 signals irrespective of the sample diversity.

621 Another related application based on a combination of k-mer and graph based ap-  
622 proach to uncover genomic variants is DBGWAS [90]. DBGWAS relies on a compact  
623 de Bruijn graph representation that helps identify the connected components of the  
624 graph induced by the neighbourhoods of all significant unitigs. DBGWAS tests for  
625 the association of each variant, indicated by the presence or absence of unitig in  
626 a particular genome, against a particular set of phenotypes using a linear mixed  
627 model. It relies on the assumption that subgraphs defined by significant unitigs are  
628 a reflection of the genomic environment, and ranks such subgraphs based on their  
629 association to the phenotype. Though this work shares similarity with our unitig  
630 graph based approach, it requires draft assemblies and prior phenotypic informa-  
631 tion to capture subgraph significant unitigs. KOMB, on the contrary, requires just  
632 metagenomic reads as input and uses K-core decomposition to capture unitigs that  
633 highlight genomic diversity in a sample.

634 Since KOMB is a novel method that is fundamentally different from previous  
635 contig graph based or k-mer based approaches, it is difficult to perform a one to  
636 one comparison of KOMB with any of the previous methods. Specifically, the con-  
637 struction of unitig graph specific network signatures captured by KOMB are unique  
638 and not measured by any other previous method. In this work, through a series of  
639 meticulous validations on simulated, synthetic, and real metagenomes we demon-  
640 strate that KOMB offers a novel solution to capture underlying repetitive regions  
641 in metagenomic data.

642 **Ethics approval and consent to participate**

643 Not applicable

644 **Consent for publication**

645 Not applicable

646 **Additional Files**

647 Additional file 1

648 Validation of KOMB on simulated repeats in single genome (random backbone), *E. coli* backbone. Effects of error  
649 and error correction approaches on KOMB profiles. Effect of unitig filter on taxonomically similar and diverse  
650 samples.

651 Additional file 2

652 Contains supporting results for distances between samples in Voigt et al.(2015) study using Earth mover's distance  
653 and KL Divergence

654 **Availability of data and materials**

655 All scripts, datasets, and results produced and used in this manuscript are available for download at:  
656 <https://rice.box.com/v/komb-manuscript>

657 **Competing interests**

658 The authors declare that they have no competing interests.

659 **Funding**

660 N.S is supported by Department of Computer Science, Rice University. A.B. and T.J.T were supported by startup  
661 funds from Rice University and the FunGCAT program from the Office of the Director of National Intelligence  
662 (ODNI), Intelligence Advanced Research Projects Activity (IARPA), via the Army Research Office (ARO) under  
663 Federal Award No. W911NF-17-2-0089. R.A.L.E. was supported by the FunGCAT program from the Office of the  
664 Director of National Intelligence (ODNI), Intelligence Advanced Research Projects Activity (IARPA), via the Army  
665 Research Office (ARO) under Federal Award No. W911NF-17-2-0089.

666 The views and conclusions contained herein are those of the authors and should not be interpreted as necessarily  
667 representing the official policies or endorsements, either expressed or implied, of the ODNI, IARPA, ARO, or the US  
668 Government.

669 **Authors contributions**

670 A.B , T.J.T, S.S developed the study. A.B wrote and implemented the software, performed the validation and  
671 analyses. N.S performed the validation and analyses. R.A.L.E, S.S and T.J.T contributed to the design of the  
672 validation and the interpretation of the results. All authors wrote the paper. All authors read and approved the final  
673 manuscript.

674 **Author details**

675 <sup>1</sup>Department of Computer Science, Rice University, 6100 Main St, 77005 Houston, Texas, USA. <sup>2</sup>Department of  
676 Electrical and Computer Engineering, Rice University, 6100 Main St, 77005 Houston, Texas, USA.

677 **References**

- 678 1. Paten, B., Novak, A.M., Eizenga, J.M., Garrison, E.: Genome graphs and the evolution of genome inference.  
679 *Genome research* **27**(5), 665–676 (2017)
- 680 2. Ulyantsev, V.I., Kazakov, S.V., Dubinkina, V.B., Tyakht, A.V., Alexeev, D.G.: Metafast: fast reference-free  
681 graph-based comparison of shotgun metagenomic data. *Bioinformatics* **32**(18), 2760–2767 (2016)
- 682 3. Pell, J., Hintze, A., Canino-Koning, R., Howe, A., Tiedje, J.M., Brown, C.T.: Scaling metagenome sequence  
683 assembly with probabilistic de bruijn graphs. *Proceedings of the National Academy of Sciences* **109**(33),  
684 13272–13277 (2012)
- 685 4. Myers, E.W.: The fragment assembly string graph. *Bioinformatics* **21**(suppl.2), 79–85 (2005)
- 686 5. Zerbino, D.R., Birney, E.: Velvet: algorithms for de novo short read assembly using de bruijn graphs. *Genome*  
687 *research* **18**(5), 821–829 (2008)
- 688 6. Rakocevic, G., Semenyuk, V., Lee, W.-P., Spencer, J., Browning, J., Johnson, I.J., Arsenijevic, V., Nadj, J.,  
689 Ghose, K., Suci, M.C., et al.: Fast and accurate genomic analyses using genome graphs. Technical report,  
690 Nature Publishing Group (2019)
- 691 7. Dilthey, A., Cox, C., Iqbal, Z., Nelson, M.R., McVean, G.: Improved genome inference in the mhc using a  
692 population reference graph. *Nature genetics* **47**(6), 682 (2015)
- 693 8. Eggertsson, H.P., Jonsson, H., Kristmundsdottir, S., Hjartarson, E., Kehr, B., Masson, G., Zink, F.,  
694 Hjorleifsson, K.E., Jonasdottir, A., Jonasdottir, A., et al.: Graphtyper enables population-scale genotyping using  
695 pangenome graphs. *Nature genetics* **49**(11), 1654 (2017)
- 696 9. Garrison, E., Sirén, J., Novak, A.M., Hickey, G., Eizenga, J.M., Dawson, E.T., Jones, W., Garg, S., Markello,  
697 C., Lin, M.F., et al.: Variation graph toolkit improves read mapping by representing genetic variation in the  
698 reference. *Nature biotechnology* (2018)
- 699 10. Ameur, A.: Goodbye reference, hello genome graphs. *Nature biotechnology* **37**(8), 866–868 (2019)
- 700 11. Kim, D., Paggi, J.M., Park, C., Bennett, C., Salzberg, S.L.: Graph-based genome alignment and genotyping  
701 with hisat2 and hisat-genotype. *Nature biotechnology* **37**(8), 907–915 (2019)

- 702 12. Chin, C.-S., Peluso, P., Sedlazeck, F.J., Nattestad, M., Concepcion, G.T., Clum, A., Dunn, C., O'Malley, R.,  
703 Figueroa-Balderas, R., Morales-Cruz, A., *et al.*: Phased diploid genome assembly with single-molecule real-time  
704 sequencing. *Nature methods* **13**(12), 1050 (2016)
- 705 13. Li, D., Liu, C.-M., Luo, R., Sadakane, K., Lam, T.-W.: Megahit: an ultra-fast single-node solution for large and  
706 complex metagenomics assembly via succinct de bruijn graph. *Bioinformatics* **31**(10), 1674–1676 (2015)
- 707 14. Namiki, T., Hachiya, T., Tanaka, H., Sakakibara, Y.: Metavelvet: an extension of velvet assembler to de novo  
708 metagenome assembly from short sequence reads. *Nucleic acids research* **40**(20), 155–155 (2012)
- 709 15. Nurk, S., Meleshko, D., Korobeynikov, A., Pevzner, P.A.: metaspades: a new versatile metagenomic assembler.  
710 *Genome research* **27**(5), 824–834 (2017)
- 711 16. Vollmers, J., Wiegand, S., Kaster, A.-K.: Comparing and evaluating metagenome assembly tools from a  
712 microbiologists perspective-not only size matters! *PLoS one* **12**(1), 0169662 (2017)
- 713 17. Chikhi, R., Limasset, A., Medvedev, P.: Compacting de bruijn graphs from sequencing data quickly and in low  
714 memory. *Bioinformatics* **32**(12), 201–208 (2016)
- 715 18. Minkin, I., Pham, S., Medvedev, P.: TwoPaCo: an efficient algorithm to build the compacted de Bruijn graph  
716 from many complete genomes. *Bioinformatics* **33**(24), 4024–4032 (2016). doi:[10.1093/bioinformatics/btw609](https://doi.org/10.1093/bioinformatics/btw609).  
717 <http://oup.prod.sis.lan/bioinformatics/article-pdf/33/24/4024/25168506/btw609.pdf>
- 718 19. Pop, M., Kosack, D.S., Salzberg, S.L.: Hierarchical scaffolding with bambus. *Genome research* **14**(1), 149–159  
719 (2004)
- 720 20. Luo, J., Wang, J., Zhang, Z., Li, M., Wu, F.-X.: Boss: a novel scaffolding algorithm based on an optimized  
721 scaffold graph. *Bioinformatics* **33**(2), 169–176 (2017)
- 722 21. Almodaresi, F., Pandey, P., Patro, R.: Rainbowfish: a succinct colored de bruijn graph representation. In: 17th  
723 International Workshop on Algorithms in Bioinformatics (WABI 2017) (2017). Schloss  
724 Dagstuhl-Leibniz-Zentrum fuer Informatik
- 725 22. Muggli, M.D., Bowe, A., Noyes, N.R., Morley, P.S., Belk, K.E., Raymond, R., Gagie, T., Puglisi, S.J., Boucher,  
726 C.: Succinct colored de bruijn graphs. *Bioinformatics* **33**(20), 3181–3187 (2017)
- 727 23. Ghurye, J.S., Cepeda-Espinoza, V., Pop, M.: Focus: Microbiome: Metagenomic assembly: Overview, challenges  
728 and applications. *The Yale journal of biology and medicine* **89**(3), 353 (2016)
- 729 24. Ghurye, J., Pop, M.: Better identification of repeats in metagenomic scaffolding. In: WABI (2016)
- 730 25. Koren, S., Treangen, T.J., Pop, M.: Bambus 2: scaffolding metagenomes. *Bioinformatics* **27**(21), 2964–2971  
731 (2011)
- 732 26. Treangen, T.J., Salzberg, S.L.: Repetitive dna and next-generation sequencing: computational challenges and  
733 solutions. *Nature Reviews Genetics* **13**(1), 36 (2012)
- 734 27. Ayling, M., Clark, M.D., Leggett, R.M.: New approaches for metagenome assembly with short reads. *Briefings*  
735 *in Bioinformatics* (2019). doi:[10.1093/bib/bbz020](https://doi.org/10.1093/bib/bbz020). bbz020.  
736 <http://oup.prod.sis.lan/bib/advance-article-pdf/doi/10.1093/bib/bbz020/27990743/bbz020.pdf>
- 737 28. Rodriguez-R, L.M., Gunturu, S., Tiedje, J.M., Cole, J.R., Konstantinidis, K.T.: Nonpareil 3: Fast estimation of  
738 metagenomic coverage and sequence diversity. *MSystems* **3**(3), 00039–18 (2018)
- 739 29. Rasheed, Z., Rangwala, H., Barbará, D.: 16s rRNA metagenome clustering and diversity estimation using locality  
740 sensitive hashing. *BMC systems biology* **7**(4), 11 (2013)
- 741 30. Ma, Z., Li, L.: Measuring metagenome diversity and similarity with hill numbers. *Molecular ecology resources*  
742 **18**(6), 1339–1355 (2018)
- 743 31. Ghurye, J., Treangen, T., Fedarko, M., Hervey, W.J., Pop, M.: Metacarvel: linking assembly graph motifs to  
744 biological variants. *Genome biology* **20**(1), 174 (2019)
- 745 32. Segarra, S., Ribeiro, A.: Stability and continuity of centrality measures in weighted graphs. *TSP* **64**(3),  
746 543–555 (2016)
- 747 33. Bonacich, P.: Factoring and weighting approaches to status scores and clique identification. *J. Math. Soc.* **2**(1),  
748 113–120 (1972)
- 749 34. Freeman, L.C.: A set of measures of centrality based on betweenness. *Sociometry*, 35–41 (1977)
- 750 35. Brandes, U.: A faster algorithm for betweenness centrality. *Journal of mathematical sociology* **25**(2), 163–177  
751 (2001)
- 752 36. Geisberger, R., Sanders, P., Schultes, D.: Better approximation of betweenness centrality. In: Proceedings of the

- 753 Meeting on Algorithm Engineering & Experiments, pp. 90–100 (2008). Society for Industrial and Applied  
754 Mathematics
- 755 37. Riondato, M., Kornaropoulos, E.M.: Fast approximation of betweenness centrality through sampling. In:  
756 WSDM (2014)
- 757 38. Zhu, Z., Surujon, D., Ortiz-Marquez, J.C., Wood, S.J., Huo, W., Isberg, R.R., Bento, J., van Opijnen, T.:  
758 Entropy of a bacterial stress response is a generalizable predictor for fitness and antibiotic sensitivity. *bioRxiv*  
759 (2019). doi:[10.1101/813709](https://doi.org/10.1101/813709). <https://www.biorxiv.org/content/early/2019/10/22/813709.full.pdf>
- 760 39. Ochman, H., Lawrence, J.G., Groisman, E.A.: Lateral gene transfer and the nature of bacterial innovation.  
761 *nature* **405**(6784), 299 (2000)
- 762 40. Hamady, M., Knight, R.: Microbial community profiling for human microbiome projects: Tools, techniques, and  
763 challenges. *Genome research* **19**(7), 1141–1152 (2009)
- 764 41. Gonzalez, A., King, A., Robeson II, M.S., Song, S., Shade, A., Metcalf, J.L., Knight, R.: Characterizing  
765 microbial communities through space and time. *Current opinion in biotechnology* **23**(3), 431–436 (2012)
- 766 42. Gómez, P., Paterson, S., De Meester, L., Liu, X., Lenzi, L., Sharma, M., McElroy, K., Buckling, A.: Local  
767 adaptation of a bacterium is as important as its presence in structuring a natural microbial community. *Nature*  
768 *communications* **7**, 12453 (2016)
- 769 43. Shakya, M., Quince, C., Campbell, J.H., Yang, Z.K., Schadt, C.W., Podar, M.: Comparative metagenomic and  
770 rrna microbial diversity characterization using archaeal and bacterial synthetic communities. *Environmental*  
771 *microbiology* **15** **6**, 1882–99 (2013)
- 772 44. Marçais, G., Delcher, A.L., Phillippy, A.M., Coston, R., Salzberg, S.L., Zimin, A.: Mummer4: a fast and  
773 versatile genome alignment system. *PLoS computational biology* **14**(1), 1005944 (2018)
- 774 45. Gevers, D., Knight, R., Petrosino, J.F., Huang, K., McGuire, A.L., Birren, B.W., Nelson, K.E., White, O.,  
775 Methé, B.A., Huttenhower, C.: The human microbiome project: a community resource for the healthy human  
776 microbiome. *PLoS biology* **10**(8), 1001377 (2012)
- 777 46. Huttenhower, C., Gevers, D., Knight, R., Abubucker, S., Badger, J.H., Chinwalla, A.T., Creasy, H.H., Earl,  
778 A.M., FitzGerald, M.G., Fulton, R.S., *et al.*: Structure, function and diversity of the healthy human  
779 microbiome. *nature* **486**(7402), 207 (2012)
- 780 47. Voigt, A.Y., Costea, P.I., Kultima, J.R., Li, S.S., Zeller, G., Sunagawa, S., Bork, P.: Temporal and technical  
781 variability of human gut metagenomes. *Genome biology* **16**(1), 73 (2015)
- 782 48. Catchen, J., Hohenlohe, P.A., Bassham, S., Amores, A., Cresko, W.A.: Stacks: an analysis tool set for  
783 population genomics. *Molecular ecology* **22**(11), 3124–3140 (2013)
- 784 49. Ji, B.W., Sheth, R.U., Dixit, P.D., Tchourine, K., Vitkup, D.: Macroecological dynamics of gut microbiota.  
785 *bioRxiv* (2019). doi:[10.1101/370676](https://doi.org/10.1101/370676). <https://www.biorxiv.org/content/early/2019/07/08/370676.full.pdf>
- 786 50. Shreiner, A.B., Kao, J.Y., Young, V.B.: The gut microbiome in health and in disease. *Current opinion in*  
787 *gastroenterology* **31**(1), 69 (2015)
- 788 51. Treangen, T.J., Wagner, J., Burns, M.P., Villapol, S.: Traumatic brain injury in mice induces acute bacterial  
789 dysbiosis within the fecal microbiome. *Frontiers in immunology* **9**, 2757 (2018)
- 790 52. Santos-Marcos, J.A., Haro, C., Vega-Rojas, A., Alcalá-Díaz, J.F., Molina-Abril, H., Leon-Acuña, A.,  
791 Lopez-Moreno, J., Landa, B.B., Tena-Sempere, M., Perez-Martinez, P., *et al.*: Sex differences in the gut  
792 microbiota as potential determinants of gender predisposition to disease. *Molecular nutrition & food research*  
793 **63**(7), 1800870 (2019)
- 794 53. Fransen, F., van Beek, A.A., Borghuis, T., Meijer, B., Hugenholtz, F., van der Gaast-de Jongh, C., Savelkoul,  
795 H.F., de Jonge, M.I., Faas, M.M., Boekschoten, M.V., *et al.*: The impact of gut microbiota on gender-specific  
796 differences in immunity. *Frontiers in immunology* **8**, 754 (2017)
- 797 54. O'Brien, C.L., Allison, G.E., Grimpen, F., Pavli, P.: Impact of colonoscopy bowel preparation on intestinal  
798 microbiota. *PLoS one* **8**(5) (2013)
- 799 55. Levin, D.A., Peres, Y.: Markov Chains and Mixing Times vol. 107. American Mathematical Soc., ??? (2017)
- 800 56. Rubner, Y., Tomasi, C., Guibas, L.J.: A metric for distributions with applications to image databases. In: Sixth  
801 International Conference on Computer Vision (IEEE Cat. No. 98CH36271), pp. 59–66 (1998). IEEE
- 802 57. Rubner, Y., Tomasi, C., Guibas, L.J.: The earth mover's distance as a metric for image retrieval. *International*  
803 *journal of computer vision* **40**(2), 99–121 (2000)



- 804 58. Kullback, S., Leibler, R.A.: On information and sufficiency. *The annals of mathematical statistics* **22**(1), 79–86  
805 (1951)
- 806 59. Csardi, G., Nepusz, T., *et al.*: The igraph software package for complex network research. *InterJournal,*  
807 *Complex Systems* **1695**(5), 1–9 (2006)
- 808 60. Dagum, L., Menon, R.: Openmp: An industry-standard api for shared-memory programming. *Computing in*  
809 *Science & Engineering* (1), 46–55 (1998)
- 810 61. Achaz, G., Rocha, E.P., Netter, P., Coissac, E.: Origin and fate of repeats in bacteria. *Nucleic acids research*  
811 **30**(13), 2987–2994 (2002)
- 812 62. Rocha, E., Danchin, A., Viari, A.: Analysis of long repeats in bacterial genomes reveals alternative evolutionary  
813 mechanisms in *bacillus subtilis* and other competent prokaryotes. *Molecular biology and evolution* **16**(9),  
814 1219–1230 (1999)
- 815 63. Liu, Y., Tang, M., Zhou, T., Do, Y.: Improving the accuracy of the k-shell method by removing redundant  
816 links: From a perspective of spreading dynamics. *Scientific reports* **5**, 13172 (2015)
- 817 64. Jackman, S.D., Vandervalk, B.P., Mohamadi, H., Chu, J., Yeo, S., Hammond, S.A., Jahesh, G., Khan, H.,  
818 Coombe, L., Warren, R.L., *et al.*: Abyss 2.0: resource-efficient assembly of large genomes using a bloom filter.  
819 *Genome research* **27**(5), 768–777 (2017)
- 820 65. Bankevich, A., Nurk, S., Antipov, D., Gurevich, A.A., Dvorkin, M., Kulikov, A.S., Lesin, V.M., Nikolenko, S.I.,  
821 Pham, S., Pribelski, A.D., *et al.*: Spades: a new genome assembly algorithm and its applications to single-cell  
822 sequencing. *Journal of computational biology* **19**(5), 455–477 (2012)
- 823 66. Langmead, B., Salzberg, S.L.: Fast gapped-read alignment with bowtie 2. *Nature Methods* **9**, 357–359 (2012)
- 824 67. Song, L., Florea, L., Langmead, B.: Lighter: fast and memory-efficient sequencing error correction without  
825 counting. *Genome biology* **15**(11), 509 (2014)
- 826 68. Li, H.: wgsim-read simulator for next generation sequencing. Github Repository (2011)
- 827 69. Alvarez-Hamelin, J.I., Dall'Asta, L., Barrat, A., Vespignani, A.: Large scale networks fingerprinting and  
828 visualization using the k-core decomposition. In: *Advances in Neural Information Processing Systems*, pp.  
829 41–50 (2006)
- 830 70. Khaouid, W., Barsky, M., Srinivasan, V., Thomo, A.: K-core decomposition of large networks on a single pc.  
831 *Proceedings of the VLDB Endowment* **9**(1), 13–23 (2015)
- 832 71. Zhang, H., Zhao, H., Cai, W., Liu, J., Zhou, W.: Using the k-core decomposition to analyze the static structure  
833 of large-scale software systems. *The Journal of Supercomputing* **53**(2), 352–369 (2010)
- 834 72. Batagelj, V., Zaversnik, M.: An  $o(m)$  algorithm for cores decomposition of networks. arXiv preprint  
835 [cs/0310049](https://arxiv.org/abs/cs/0310049) (2003)
- 836 73. Clauset, A., Newman, M.E., Moore, C.: Finding community structure in very large networks. *Physical review E*  
837 **70**(6), 066111 (2004)
- 838 74. Novák, P., Neumann, P., Macas, J.: Graph-based clustering and characterization of repetitive sequences in  
839 next-generation sequencing data. *BMC bioinformatics* **11**(1), 378 (2010)
- 840 75. Fruchterman, T.M., Reingold, E.M.: Graph drawing by force-directed placement. *Software: Practice and*  
841 *experience* **21**(11), 1129–1164 (1991)
- 842 76. Chu, C., Nielsen, R., Wu, Y.: Repdenovo: inferring de novo repeat motifs from short sequence reads. *PloS one*  
843 **11**(3), 0150719 (2016)
- 844 77. Guo, R., Li, Y.-R., He, S., Ou-Yang, L., Sun, Y., Zhu, Z.: Replong: de novo repeat identification using long  
845 read sequencing data. *Bioinformatics* **34**(7), 1099–1107 (2017)
- 846 78. Li, R., Ye, J., Li, S., Wang, J., Han, Y., Ye, C., Wang, J., Yang, H., Yu, J., Wong, G.K.-S., *et al.*: Reas:  
847 Recovery of ancestral sequences for transposable elements from the unassembled reads of a whole genome  
848 shotgun. *PLoS computational biology* **1**(4), 43 (2005)
- 849 79. Price, A.L., Jones, N.C., Pevzner, P.A.: De novo identification of repeat families in large genomes.  
850 *Bioinformatics* **21**(suppl.1), 351–358 (2005)
- 851 80. Morgulis, A., Gertz, E.M., Schäffer, A.A., Agarwala, R.: Windowmasker: window-based masker for sequenced  
852 genomes. *Bioinformatics* **22**(2), 134–141 (2005)
- 853 81. Achaz, G., Boyer, F., Rocha, E.P., Viari, A., Coissac, E.: Repseek, a tool to retrieve approximate repeats from  
854 large dna sequences. *Bioinformatics* **23**(1), 119–121 (2006)

- 855 82. Kurtz, S., Narechania, A., Stein, J.C., Ware, D.: A new method to compute k-mer frequencies and its  
856 application to annotate large repetitive plant genomes. *BMC genomics* **9**(1), 517 (2008)
- 857 83. Girgis, H.Z.: Red: an intelligent, rapid, accurate tool for detecting repeats de-novo on the genomic scale. *BMC*  
858 *bioinformatics* **16**(1), 227 (2015)
- 859 84. Koch, P., Platzer, M., Downie, B.R.: Repark—de novo creation of repeat libraries from whole-genome ngs  
860 reads. *Nucleic acids research* **42**(9), 80–80 (2014)
- 861 85. Misawa, K.: Rf: A method for filtering short reads with tandem repeats for genome mapping. *Genomics* **102**(1),  
862 35–37 (2013)
- 863 86. Chen, S., Chen, Y., Sun, F., Waterman, M.S., Zhang, X.: A new statistic for efficient detection of repetitive  
864 sequences. *Bioinformatics* **35**(22), 4596–4606 (2019). doi:[10.1093/bioinformatics/btz262](https://doi.org/10.1093/bioinformatics/btz262)
- 865 87. Reinert, G., Chew, D., Sun, F., Waterman, M.S.: Alignment-free sequence comparison (i): Statistics and power.  
866 *Journal of Computational Biology* **16**(12), 1615–1634 (2009)
- 867 88. Torney, D.C., Burks, C., Davison, D., Sirotkin, K.M.: Computation of d2: a measure of sequence dissimilarity  
868 (1990)
- 869 89. Lippert, R.A., Huang, H., Waterman, M.S.: Distributional regimes for the number of k-word matches between  
870 two random sequences. *Proceedings of the National Academy of Sciences* **99**(22), 13980–13989 (2002)
- 871 90. Jaillard, M., Lima, L., Tournoud, M., Mahé, P., Van Belkum, A., Lacroix, V., Jacob, L.: A fast and agnostic  
872 method for bacterial genome-wide association studies: Bridging the gap between k-mers and genetic events.  
873 *PLoS genetics* **14**(11), 1007758 (2018)
